# Supplementary material for: N-Methylcarbamoyl azide: spectroscopy, X-ray structure and decomposition via methylcarbamoyl nitrene
Source: Royal Society of Chemistry journal article supplement (doi:10.1039/c7qo00277g), 2017-01-01
Supplement: c7qo00277g1.pdf [file c7qo00277g1.pdf]

## Electronic Supplementary Information

### ***N*-Methylcarbamoyl Azide: Spectroscopy, X-ray Structure and Decomposition via Methylcarbamoyl Nitrene**

Huabin Wan,<sup>a</sup> Hongmin Li,<sup>a</sup> Jian Xu,<sup>a</sup> Zhuang Wu,<sup>a</sup> Qifan Liu,<sup>a</sup> Xianxu Chu,<sup>a</sup> Manabu Abe,<sup>\*b</sup>  
Didier Bégue<sup>c</sup> and Xiaoqing Zeng<sup>\*a</sup>

<sup>a</sup> College of Chemistry, Chemical Engineering and Materials Science, Soochow University, Suzhou 215123, China.

<sup>b</sup> Department of Chemistry, Graduate School of Science, Hiroshima University, 1-3-1 Kagamiyama, Higashi-Hiroshima, Hiroshima 739-8526, Japan.

<sup>c</sup> Institut des Sciences Analytiques et de Physico-Chimie pour l'Environnement et les Matériaux (IPREM), Université de Pau et des Pays de l'Adour, Pau, France.

## Table of Contents

|                                                                                                                                                                           |     |
|---------------------------------------------------------------------------------------------------------------------------------------------------------------------------|-----|
| <b>Figure S1.</b> The $^1\text{H}$ NMR ( $\text{CDCl}_3$ ) of $\text{Me(H)NC(O)N}_3$ .....                                                                                | S2  |
| <b>Figure S2.</b> The $^{13}\text{C}$ NMR ( $\text{CDCl}_3$ ) of $\text{Me(H)NC(O)N}_3$ .....                                                                             | S3  |
| <b>Figure S3.</b> Calculated IRC for the decomposition of $\text{Me(H)NC(O)N}_3$ into $\text{CH}_3\text{NCO}$ and $\text{HN}_3$ at the B3LYP/6-311++G(3df,3pd) level..... | S4  |
| <b>Table S1.</b> Calculated <sup>a</sup> IR frequencies ( $\text{cm}^{-1}$ ) of $\text{Me(H)NC(O)N}_3$ .....                                                              | S5  |
| <b>Table S2.</b> Calculated <sup>a</sup> IR frequencies ( $\text{cm}^{-1}$ ) for $\text{Me(H)NNCO}$ with different theoretical methods.....                               | S6  |
| <b>Table S3.</b> Calculated <sup>a</sup> IR frequencies ( $\text{cm}^{-1}$ ) for singlet $\text{Me(H)NC(O)N}$ with different theoretical methods.....                     | S7  |
| <b>Table S4.</b> Calculated <sup>a</sup> IR frequencies ( $\text{cm}^{-1}$ ) for triplet $\text{Me(H)NC(O)N}$ with different theoretical methods.....                     | S8  |
| <b>Table S5.</b> Calculated vertical transitions for $\text{Me(H)NC(O)N}_3$ at the TD-B3LYP/6-311++G(3df,3pd) level.....                                                  | S9  |
| <b>Table S6.</b> Calculated vertical transitions for $\text{Me(H)NC(O)N}$ at the TD-B3LYP/6-311++G(3df,3pd) level.....                                                    | S10 |
| <b>Table S7.</b> Calculated vertical transitions for $\text{Me(H)NNCO}$ at the TD-B3LYP/6-311++G(3df,3pd) level.....                                                      | S11 |
| Calculated absolute energies (in Hartrees), and the atomic coordinates (in angstroms) for all optimized structures.....                                                   | S12 |
| CASPT2(8,8)/6-311+G** calculated energies (in Hartrees) of $\text{Me(H)NC(O)N}$ .....                                                                                     | S43 |

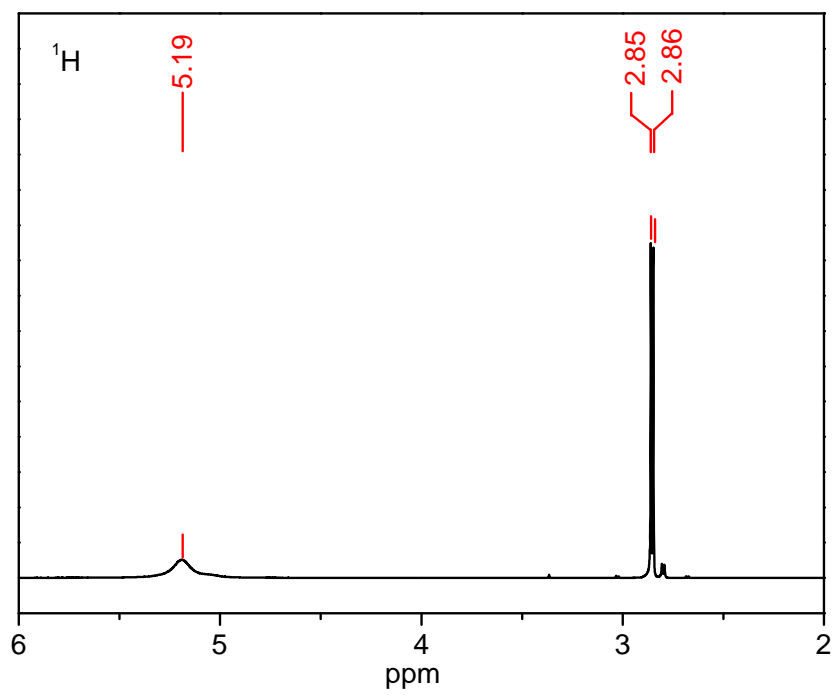

**Figure S1.** The  $^1\text{H}$  NMR ( $\text{CDCl}_3$ ) of  $\text{Me}(\text{H})\text{NC}(\text{O})\text{N}_3$ .

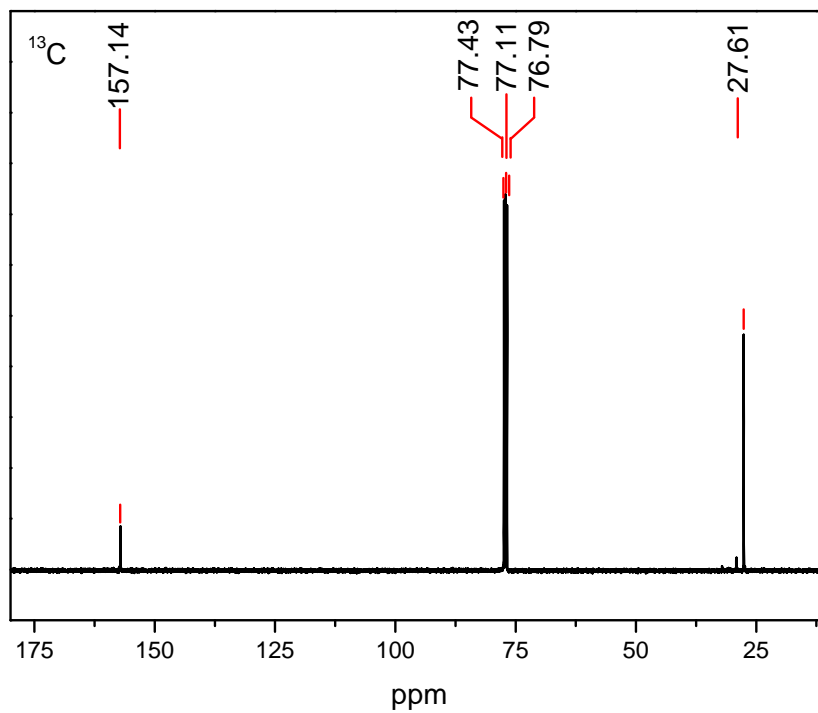

**Figure S2.** The  $^{13}\text{C}$  NMR ( $\text{CDCl}_3$ ) of  $\text{Me(H)NC(O)N}_3$ .

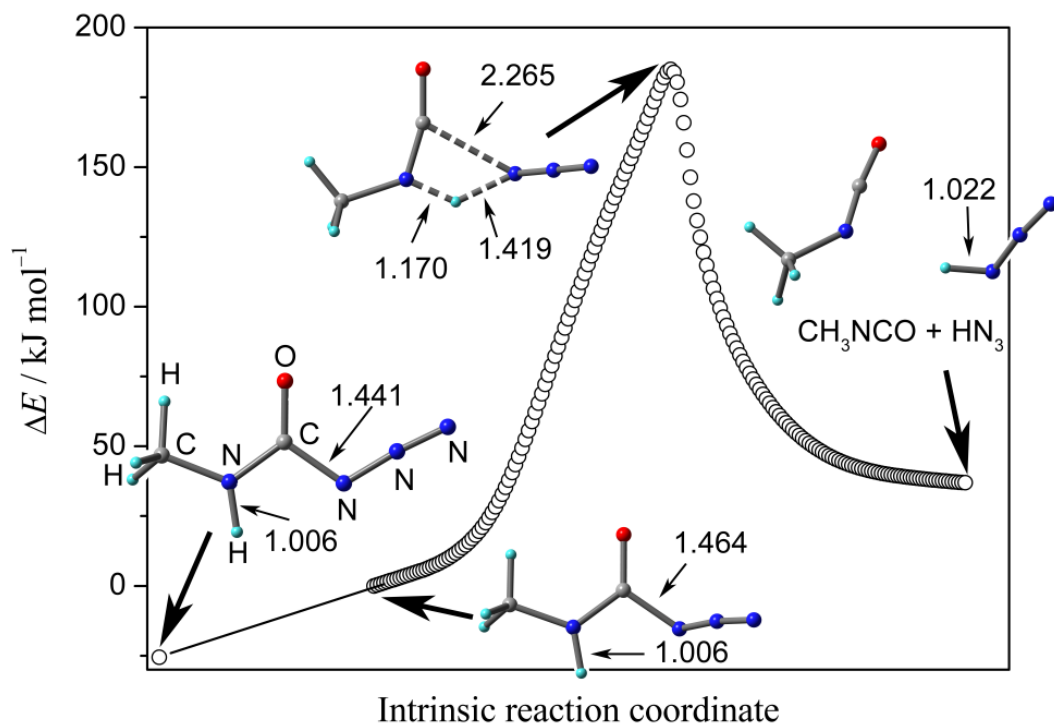

**Figure S3.** Calculated IRC for the decomposition of Me(H)NC(O)N<sub>3</sub> into CH<sub>3</sub>NCO and HN<sub>3</sub> at the B3LYP/6-311++G(3df,3pd) level.

**Table S1.** Calculated<sup>a</sup> IR frequencies (cm<sup>-1</sup>) of Me(H)NC(O)N<sub>3</sub>.

| <i>syn-syn</i> | <i>anti-syn</i> | <i>syn-anti</i> | <i>anti-anti</i> |
|----------------|-----------------|-----------------|------------------|
| 3641 (46)      | 3648 (62)       | 3646 (25)       | 3618 (44)        |
| 3147 (1)       | 3131 (13)       | 3138 (8)        | 3126 (11)        |
| 3086 (22)      | 3100 (17)       | 3105 (14)       | 3098 (12)        |
| 3030 (55)      | 3036 (41)       | 3040 (36)       | 3037 (29)        |
| 2283 (585)     | 2286 (567)      | 2240 (509)      | 2252 (476)       |
| 1778 (319)     | 1773 (475)      | 1795 (553)      | 1795 (772)       |
| 1563 (255)     | 1523 (43)       | 1543 (164)      | 1526 (28)        |
| 1503 (26)      | 1492 (14)       | 1509 (33)       | 1501 (9)         |
| 1495 (66)      | 1477 (36)       | 1482 (18)       | 1476 (18)        |
| 1453 (19)      | 1463 (9)        | 1460 (10)       | 1467 (7)         |
| 1316 (298)     | 1342 (621)      | 1314 (274)      | 1330 (353)       |
| 1232 (351)     | 1308 (128)      | 1229 (253)      | 1296 (110)       |
| 1180 (32)      | 1196 (4)        | 1188 (11)       | 1191 (7)         |
| 1154 (11)      | 1154 (4)        | 1155 (5)        | 1149 (5)         |
| 1056 (40)      | 1046 (107)      | 1064 (29)       | 1044 (105)       |
| 911 (28)       | 872 (9)         | 875 (36)        | 830 (12)         |
| 762 (7)        | 742 (30)        | 745 (13)        | 746 (48)         |
| 746 (11)       | 662 (37)        | 721 (16)        | 660 (7)          |
| 594 (2)        | 596 (9)         | 591 (10)        | 589 (9)          |
| 520 (9)        | 578 (11)        | 544 (10)        | 571 (36)         |
| 499 (93)       | 502 (2)         | 474 (8)         | 519 (32)         |
| 450 (15)       | 472 (67)        | 333 (60)        | 503 (16)         |
| 288 (7)        | 259 (<1)        | 281 (15)        | 285 (3)          |
| 157 (3)        | 157 (1)         | 155 (5)         | 167 (1)          |
| 150 (1)        | 152 (1)         | 146 (5)         | 140 (1)          |
| 86 (4)         | 101 (3)         | 62 (4)          | 118 (1)          |
| 38 (<1)        | 47 (1)          | 49 (6)          | 78 (4)           |

<sup>a</sup> Calculation at the B3LYP/6-311++G(3df,3pd) level of theory, IR intensities (km mol<sup>-1</sup>) in parentheses.

**Table S2.** Calculated<sup>a</sup> IR frequencies (cm<sup>-1</sup>) for Me(H)NNCO with different theoretical methods.

| B3LYP      | B3PW91     | M06-2X      |
|------------|------------|-------------|
| 3534 (10)  | 3555 (11)  | 3569 (16)   |
| 3116 (15)  | 3130 (14)  | 3150 (10)   |
| 3082 (20)  | 3093 (20)  | 3114 (14)   |
| 3003 (50)  | 3009 (48)  | 3031 (33)   |
| 2310 (977) | 2340 (932) | 2365 (1090) |
| 1546 (7)   | 1550 (5)   | 1558 (5)    |
| 1510 (6)   | 1504 (9)   | 1519 (8)    |
| 1481 (10)  | 1474 (11)  | 1491 (11)   |
| 1452 (1)   | 1445 (<1)  | 1455 (1)    |
| 1407 (3)   | 1422 (6)   | 1442 (5)    |
| 1206 (30)  | 1206 (32)  | 1217 (32)   |
| 1152 (2)   | 1147 (2)   | 1157 (3)    |
| 1035 (5)   | 1057 (5)   | 1076 (6)    |
| 909 (44)   | 908 (34)   | 920 (28)    |
| 795 (55)   | 807 (71)   | 829 (80)    |
| 663 (23)   | 666 (21)   | 686 (23)    |
| 556 (23)   | 551 (21)   | 579 (24)    |
| 435 (1)    | 437 (1)    | 449 (1)     |
| 282 (6)    | 284 (6)    | 295 (3)     |
| 180 (9)    | 180 (8)    | 170 (10)    |
| 52 (3)     | 60 (3)     | 56(3)       |

<sup>a</sup> The 6-311++G(3df,3pd) basis set was used. IR intensities (km mol<sup>-1</sup>) in parentheses.

**Table S3.** Calculated<sup>a</sup> IR frequencies (cm<sup>-1</sup>) for singlet Me(H)NC(O)N with different theoretical methods.

| <i>syn</i> -singlet |            |            | <i>anti</i> -singlet |            |            |
|---------------------|------------|------------|----------------------|------------|------------|
| B3LYP               | B3PW91     | M06-2X     | B3LYP                | B3PW91     | M06-2X     |
| 3637 (50)           | 3660 (53)  | 3673 (70)  | 3627 (55)            | 3649 (57)  | 3660 (76)  |
| 3142 (3)            | 3154 (3)   | 3156 (2)   | 3134 (7)             | 3148 (6)   | 3166 (5)   |
| 3097 (17)           | 3110 (16)  | 3130 (9)   | 3105 (13)            | 3118 (12)  | 3140 (7)   |
| 3040 (41)           | 3046 (41)  | 3059 (31)  | 3037 (36)            | 3044 (35)  | 3063 (27)  |
| 1831 (443)          | 1869 (434) | 1921 (483) | 1835 (416)           | 1873 (410) | 1927 (463) |
| 1528 (3)            | 1525 (3)   | 1535 (5)   | 1541 (28)            | 1543 (33)  | 1548 (24)  |
| 1493 (7)            | 1490 (21)  | 1497 (7)   | 1502 (17)            | 1497 (20)  | 1509 (33)  |
| 1491 (17)           | 1485 (8)   | 1492 (27)  | 1496 (16)            | 1487 (11)  | 1499 (7)   |
| 1458 (14)           | 1450 (13)  | 1457 (11)  | 1466 (13)            | 1458 (12)  | 1470 (11)  |
| 1359 (22)           | 1373 (23)  | 1359 (22)  | 1310 (26)            | 1320 (26)  | 1307 (30)  |
| 1154 (<1)           | 1161 (41)  | 1171 (46)  | 1159 (2)             | 1169 (16)  | 1178 (19)  |
| 1145 (42)           | 1150 (<1)  | 1156 (<1)  | 1153 (12)            | 1157 (4)   | 1164 (4)   |
| 1133 (21)           | 1135 (17)  | 1134 (19)  | 1143 (21)            | 1143 (13)  | 1151 (15)  |
| 909 (7)             | 921 (8)    | 940 (9)    | 922 (10)             | 933 (11)   | 953 (14)   |
| 616 (20)            | 612 (19)   | 611 (22)   | 623 (14)             | 619 (11)   | 618 (7)    |
| 597 (1)             | 599 (1)    | 607 (<1)   | 581 (10)             | 585 (10)   | 610(15)    |
| 456 (19)            | 474 (18)   | 530 (18)   | 456 (12)             | 471 (11)   | 505 (9)    |
| 444 (91)            | 449 (91)   | 455 (92)   | 414 (106)            | 419 (107)  | 439 (112)  |
| 241 (4)             | 238 (5)    | 245 (5)    | 220 (4)              | 218 (5)    | 223 (5)    |
| 133 (3)             | 137 (2)    | 136 (3)    | 138 (4)              | 141(4)     | 148 (4)    |
| 57 (1)              | 62 (1)     | 60 (1)     | 78 (<1)              | 74 (<1)    | 100 (1)    |

<sup>a</sup> The 6-311++G(3df,3pd) basis set was used. IR intensities (km mol<sup>-1</sup>) in parentheses.



**Table S4.** Calculated<sup>a</sup> IR frequencies (cm<sup>-1</sup>) for triplet Me(H)NC(O)N with different theoretical methods.

| <i>syn</i> -triplet |            |            | <i>anti</i> -triplet |            |            |
|---------------------|------------|------------|----------------------|------------|------------|
| B3LYP               | B3PW91     | M06-2X     | B3LYP                | B3PW91     | M06-2X     |
| 3624 (50)           | 3643 (50)  | 3677 (73)  | 3600 (45)            | 3623 (46)  | 3637 (57)  |
| 3144 (1)            | 3158 (<1)  | 3170 (6)   | 3137(4)              | 3147 (4)   | 3157 (5)   |
| 3096 (16)           | 3100 (15)  | 3123 (7)   | 3084 (18)            | 3099 (16)  | 3133 (12)  |
| 3030 (30)           | 3039 (33)  | 3059 (18)  | 3032 (38)            | 3038 (38)  | 3067 (31)  |
| 1645 (241)          | 1680 (259) | 1752 (321) | 1646 (316)           | 1675 (339) | 1750 (445) |
| 1543 (50)           | 1550 (58)  | 1547 (142) | 1522 (13)            | 1519 (13)  | 1541 (22)  |
| 1500 (8)            | 1489 (7)   | 1515 (17)  | 1489 (7)             | 1480 (7)   | 1501 (7)   |
| 1483 (21)           | 1481 (18)  | 1489 (13)  | 1472 (4)             | 1465 (3)   | 1489 (1)   |
| 1450 (21)           | 1440 (18)  | 1461 (14)  | 1450 (2)             | 1449 (<1)  | 1475 (19)  |
| 1229 (55)           | 1238 (60)  | 1259 (46)  | 1350 (92)            | 1365 (91)  | 1376 (136) |
| 1166 (3)            | 1163 (10)  | 1185 (5)   | 1162 (26)            | 1171 (20)  | 1195 (25)  |
| 1144 (8)            | 1140 (<1)  | 1159 (1)   | 1150 (<1)            | 1145 (<1)  | 1163 (<1)  |
| 1086 (5)            | 1104 (4)   | 1117 (6)   | 1063 (23)            | 1069 (25)  | 1081 (33)  |
| 894 (8)             | 901 (13)   | 921 (4)    | 851 (8)              | 862 (9)    | 867 (4)    |
| 687 (14)            | 689 (11)   | 701 (21)   | 686 (74)             | 688 (73)   | 697 (65)   |
| 625 (6)             | 627 (4)    | 637 (7)    | 567 (10)             | 570 (10)   | 580 (9)    |
| 467 (108)           | 486 (111)  | 415 (13)   | 522 (37)             | 525 (37)   | 512 (52)   |
| 401 (19)            | 400 (20)   | 383 (94)   | 467 (25)             | 463 (25)   | 492 (19)   |
| 263 (3)             | 266 (3)    | 253 (3)    | 273 (<1)             | 271 (<1)   | 306 (<1)   |
| 152 (1)             | 153 (1)    | 147 (3)    | 132 (1)              | 136 (1)    | 151 (1)    |
| 30 (<1)             | 33 (<1)    | 88 (5)     | 69 (<1)              | 70 (<1)    | 88 (<1)    |

<sup>a</sup> The 6-311++G(3df,3pd) basis set was used. IR intensities (km mol<sup>-1</sup>) in parentheses.

**Table S5.** Calculated vertical transitions for Me(H)NC(O)N<sub>3</sub> at the TD-B3LYP/6-311++G(3df,3pd) level.

| <i>syn-syn</i> |                     | <i>anti-syn</i> |                     | <i>syn-anti</i> |                     | <i>anti-anti</i> |                     |
|----------------|---------------------|-----------------|---------------------|-----------------|---------------------|------------------|---------------------|
| energy         | Oscillator strength | energy          | Oscillator strength | energy          | Oscillator strength | energy           | Oscillator strength |
| 257.37 nm      | f = 0.0004          | 249.48 nm       | f = 0.0005          | 263.30 nm       | f = 0.0005          | 259.64 nm        | f = 0.0019          |
| 233.92 nm      | f = 0.0002          | 235.54 nm       | f = 0.0005          | 239.61 nm       | f = 0.0005          | 233.57 nm        | f = 0.0013          |
| 227.80 nm      | f = 0.0004          | 234.35 nm       | f = 0.0004          | 230.19 nm       | f = 0.0013          | 225.28 nm        | f = 0.0039          |
| 225.64 nm      | f = 0.0007          | 211.72 nm       | f = 0.0933          | 225.17 nm       | f = 0.0012          | 215.88 nm        | f = 0.0156          |
| 202.58 nm      | f = 0.1839          | 196.56 nm       | f = 0.0001          | 211.82 nm       | f = 0.0573          | 205.36 nm        | f = 0.0381          |
| 195.14 nm      | f = 0.0005          | 194.60 nm       | f = 0.1492          | 201.25 nm       | f = 0.0517          | 198.12 nm        | f = 0.0443          |
| 191.55 nm      | f = 0.0962          | 183.41 nm       | f = 0.0166          | 195.16 nm       | f = 0.0009          | 194.23 nm        | f = 0.0029          |
| 180.85 nm      | f = 0.034           | 176.07 nm       | f = 0.0030          | 186.15 nm       | f = 0.0004          | 185.06 nm        | f = 0.0018          |
| 176.25 nm      | f = 0.0005          | 174.94 nm       | f = 0.0121          | 181.01 nm       | f = 0.0030          | 182.55 nm        | f = 0.0023          |
| 172.09 nm      | f = 0.0107          |                 |                     | 179.22 nm       | f = 0.0089          | 174.59 nm        | f = 0.0427          |

**Table S6.** Calculated vertical transitions for Me(H)NC(O)N at the TD-B3LYP/6-311++G(3df,3pd) level.

| <i>syn</i> -singlet |                     | <i>syn</i> -triplet |                     | <i>anti</i> -singlet |                     | <i>anti</i> -triplet |                     |
|---------------------|---------------------|---------------------|---------------------|----------------------|---------------------|----------------------|---------------------|
| energy              | Oscillator strength | energy              | Oscillator strength | energy               | Oscillator strength | energy               | Oscillator strength |
| 591.69 nm           | f = 0.0004          | 537.10 nm           | f = 0.0193          | 581.05 nm            | f = 0.0005          | 578.86 nm            | f = 0.0149          |
| 276.05 nm           | f = 0.0005          | 443.16 nm           | f = 0.0042          | 225.65 nm            | f = 0.0002          | 432.77 nm            | f = 0.0085          |
| 229.41 nm           | f = 0.0007          | 401.95 nm           | f = 0.0003          | 212.21 nm            | f = 0.0104          | 299.18 nm            | f = 0.0045          |
| 212.27 nm           | f = 0.0065          | 287.27 nm           | f = 0.0053          | 203.02 nm            | f = 0.0122          | 244.45 nm            | f = 0.0118          |
| 202.31 nm           | f = 0.0120          | 241.50 nm           | f = 0.0107          | 198.81 nm            | f = 0.0090          | 213.64 nm            | f = 0.0182          |
| 199.84 nm           | f = 0.0002          | 212.80 nm           | f = 0.0416          | 184.18 nm            | f = 0.0061          | 198.83 nm            | f = 0.0001          |
| 184.24 nm           | f = 0.0013          | 200.27 nm           | f = 0.0003          | 180.29 nm            | f = 0.0197          | 198.41 nm            | f = 0.0003          |
| 179.51 nm           | f = 0.0052          | 189.80 nm           | f = 0.0001          | 179.04 nm            | f = 0.0018          | 188.79 nm            | f = 0.0002          |
| 178.59 nm           | f = 0.0001          |                     |                     | 163.33 nm            | f = 0.0930          |                      |                     |
| 164.70 nm           | f = 0.0175          |                     |                     |                      |                     |                      |                     |

**Table S7.** Calculated vertical transitions for Me(H)NNCO at the TD-B3LYP/6-311++G(3df.3pd) level.

| energy    | Oscillator strength |
|-----------|---------------------|
| 274.38 nm | f = 0.0125          |
| 217.70 nm | f = 0.0016          |
| 202.87 nm | f = 0.0036          |
| 198.12 nm | f = 0.0065          |
| 192.50 nm | f = 0.0218          |
| 182.70 nm | f = 0.0472          |
| 173.08 nm | f = 0.0470          |
| 165.84 nm | f = 0.0392          |
| 160.61 nm | f = 0.0056          |

Calculated absolute energies (in Hartrees), and the atomic coordinates (in angstroms)  
for all optimized structures.

*syn-syn* Me(H)NC(O)N<sub>3</sub>

**B3LYP/6-311++G(3df,3pd)**

|                                              |             |             |             |
|----------------------------------------------|-------------|-------------|-------------|
| Zero-point correction=                       |             |             | 0.077731    |
| Thermal correction to Energy=                |             |             | 0.085108    |
| Thermal correction to Enthalpy=              |             |             | 0.086052    |
| Thermal correction to Gibbs Free Energy=     |             |             | 0.045115    |
| Sum of electronic and zero-point Energies=   |             |             | -372.870139 |
| Sum of electronic and thermal Energies=      |             |             | -372.862762 |
| Sum of electronic and thermal Enthalpies=    |             |             | -372.861818 |
| Sum of electronic and thermal Free Energies= |             |             | -372.902755 |
| N                                            | -1.43539900 | -0.60082100 | -0.01500700 |
| H                                            | -1.35786900 | -1.60293100 | 0.01475800  |
| C                                            | -2.74150000 | 0.02682200  | 0.01148800  |
| H                                            | -2.61375900 | 1.08719900  | -0.18476400 |
| H                                            | -3.38342600 | -0.40231800 | -0.75722900 |
| H                                            | -3.22368400 | -0.09367500 | 0.98331200  |
| C                                            | -0.28584100 | 0.10904100  | -0.00523400 |
| O                                            | -0.18458200 | 1.31460800  | -0.00561500 |
| N                                            | 0.83374000  | -0.79756200 | -0.00112000 |
| N                                            | 1.93759800  | -0.24286200 | 0.00260100  |
| N                                            | 2.98112300  | 0.16691300  | 0.00657200  |

**CBS-QB3**

|                   |             |                      |             |
|-------------------|-------------|----------------------|-------------|
| Temperature=      | 298.150000  | Pressure=            | 1.000000    |
| E(ZPE)=           | 0.076995    | E(Thermal)=          | 0.084374    |
| E(SCF)=           | -370.794514 | DE(MP2)=             | -1.352824   |
| DE(CBS)=          | -0.129203   | DE(MP34)=            | -0.017632   |
| DE(CCSD)=         | -0.042853   | DE(Int)=             | 0.041765    |
| DE(Empirical)=    | -0.059409   |                      |             |
| CBS-QB3 (0 K)=    | -372.277674 | CBS-QB3 Energy=      | -372.270295 |
| CBS-QB3 Enthalpy= | -372.269351 | CBS-QB3 Free Energy= | -372.309925 |
| N                 | -1.43671500 | -0.60383700          | -0.00033300 |
| H                 | -1.35357900 | -1.60781900          | 0.00023900  |
| C                 | -2.74654900 | 0.02170100           | 0.00022700  |
| H                 | -2.60026800 | 1.10034000           | -0.00016200 |
| H                 | -3.31694900 | -0.25930600          | -0.88960700 |
| H                 | -3.31603900 | -0.25878000          | 0.89082300  |
| C                 | -0.28872500 | 0.11487800           | -0.00011000 |
| O                 | -0.18891600 | 1.32114100           | -0.00010100 |
| N                 | 0.83335400  | -0.79507100          | -0.00001100 |

|   |            |             |            |
|---|------------|-------------|------------|
| N | 1.94128400 | -0.24372200 | 0.00005100 |
| N | 2.99205000 | 0.16219700  | 0.00012200 |

**B3LYP/aug-cc-pVTZ**

|                                              |             |             |             |
|----------------------------------------------|-------------|-------------|-------------|
| Zero-point correction=                       |             |             | 0.077636    |
| Thermal correction to Energy=                |             |             | 0.085000    |
| Thermal correction to Enthalpy=              |             |             | 0.085944    |
| Thermal correction to Gibbs Free Energy=     |             |             | 0.045130    |
| Sum of electronic and zero-point Energies=   |             |             | -372.877826 |
| Sum of electronic and thermal Energies=      |             |             | -372.870462 |
| Sum of electronic and thermal Enthalpies=    |             |             | -372.869518 |
| Sum of electronic and thermal Free Energies= |             |             | -372.910332 |
| N                                            | 1.07642100  | 1.12324200  | 0.00000000  |
| H                                            | 1.98278400  | 0.68855400  | 0.00000000  |
| C                                            | 0.96493500  | 2.56841000  | 0.00000000  |
| H                                            | -0.09012000 | 2.82598200  | 0.00000000  |
| H                                            | 1.43156800  | 2.99568600  | 0.88870500  |
| H                                            | 1.43156800  | 2.99568600  | -0.88870500 |
| C                                            | 0.00000000  | 0.30631500  | 0.00000000  |
| O                                            | -1.16312000 | 0.64549800  | 0.00000000  |
| N                                            | 0.44403400  | -1.06462800 | 0.00000000  |
| N                                            | -0.47115900 | -1.89507300 | 0.00000000  |
| N                                            | -1.22650300 | -2.72329100 | 0.00000000  |

*anti-syn* Me(H)NC(O)N<sub>3</sub>

**B3LYP/6-311++G(3df,3pd)**

|                                              |             |             |             |
|----------------------------------------------|-------------|-------------|-------------|
| Zero-point correction=                       |             |             | 0.077727    |
| Thermal correction to Energy=                |             |             | 0.085076    |
| Thermal correction to Enthalpy=              |             |             | 0.086020    |
| Thermal correction to Gibbs Free Energy=     |             |             | 0.045271    |
| Sum of electronic and zero-point Energies=   |             |             | -372.867036 |
| Sum of electronic and thermal Energies=      |             |             | -372.859687 |
| Sum of electronic and thermal Enthalpies=    |             |             | -372.858743 |
| Sum of electronic and thermal Free Energies= |             |             | -372.899492 |
| N                                            | 1.62038300  | 0.35455500  | -0.03017800 |
| H                                            | 2.17991300  | 1.18858900  | 0.01843900  |
| C                                            | 2.27492300  | -0.94303300 | 0.01737500  |
| H                                            | 1.87170700  | -1.60873300 | -0.74244800 |
| H                                            | 3.33383100  | -0.79584200 | -0.18098900 |
| H                                            | 2.16589800  | -1.42160200 | 0.99169000  |
| C                                            | 0.28852600  | 0.59070300  | -0.00505100 |
| O                                            | -0.22395400 | 1.68795700  | 0.01437300  |
| N                                            | -0.45042500 | -0.64154900 | -0.01299200 |
| N                                            | -1.67784500 | -0.49552200 | -0.00281400 |

N -2.79788700 -0.46778200 0.00660900

### CBS-QB3

|                   |             |                      |             |
|-------------------|-------------|----------------------|-------------|
| Temperature=      | 298.150000  | Pressure=            | 1.000000    |
| E(ZPE)=           | 0.077036    | E(Thermal)=          | 0.084400    |
| E(SCF)=           | -370.791188 | DE(MP2)=             | -1.353476   |
| DE(CBS)=          | -0.129210   | DE(MP34)=            | -0.017450   |
| DE(CCSO)=         | -0.042836   | DE(Int)=             | 0.041771    |
| DE(Empirical)=    | -0.059393   |                      |             |
| CBS-QB3 (0 K)=    | -372.274746 | CBS-QB3 Energy=      | -372.267382 |
| CBS-QB3 Enthalpy= | -372.266438 | CBS-QB3 Free Energy= | -372.307203 |
| N                 | 1.62421400  | 0.35111300           | -0.04877500 |
| H                 | 2.17844600  | 1.19040100           | 0.02055500  |
| C                 | 2.29368800  | -0.93947400          | 0.02800300  |
| H                 | 1.68231000  | -1.69958800          | -0.45398300 |
| H                 | 3.24721200  | -0.87485100          | -0.49887400 |
| H                 | 2.48201600  | -1.24751700          | 1.06216800  |
| C                 | 0.28884400  | 0.59042800           | -0.00712800 |
| O                 | -0.22127400 | 1.68848400           | 0.02380300  |
| N                 | -0.45729000 | -0.64307900          | -0.01989800 |
| N                 | -1.68606300 | -0.49470700          | -0.00489400 |
| N                 | -2.81157300 | -0.46790300          | 0.00991900  |

### B3LYP/aug-cc-pVTZ

|                                              |             |             |             |
|----------------------------------------------|-------------|-------------|-------------|
| Zero-point correction=                       |             |             | 0.077660    |
| Thermal correction to Energy=                |             |             | 0.084991    |
| Thermal correction to Enthalpy=              |             |             | 0.085935    |
| Thermal correction to Gibbs Free Energy=     |             |             | 0.045312    |
| Sum of electronic and zero-point Energies=   |             |             | -372.874754 |
| Sum of electronic and thermal Energies=      |             |             | -372.867423 |
| Sum of electronic and thermal Enthalpies=    |             |             | -372.866479 |
| Sum of electronic and thermal Free Energies= |             |             | -372.907102 |
| N                                            | 1.62051200  | 0.35432600  | -0.02933300 |
| H                                            | 2.17975100  | 1.18813300  | 0.01786000  |
| C                                            | 2.27613400  | -0.94304200 | 0.01693400  |
| H                                            | 1.87338900  | -1.60847600 | -0.74367800 |
| H                                            | 3.33507300  | -0.79420500 | -0.18119200 |
| H                                            | 2.16745500  | -1.42273000 | 0.99101800  |
| C                                            | 0.28839700  | 0.59039700  | -0.00491800 |
| O                                            | -0.22445500 | 1.68949700  | 0.01400400  |
| N                                            | -0.45066400 | -0.64223500 | -0.01270100 |
| N                                            | -1.67835100 | -0.49487200 | -0.00272300 |
| N                                            | -2.79824300 | -0.46905100 | 0.00645100  |

*syn-anti* Me(H)NC(O)N<sub>3</sub>

**B3LYP/6-311++G(3df,3pd)**

|                                              |             |
|----------------------------------------------|-------------|
| Zero-point correction=                       | 0.077196    |
| Thermal correction to Energy=                | 0.084760    |
| Thermal correction to Enthalpy=              | 0.085704    |
| Thermal correction to Gibbs Free Energy=     | 0.044243    |
| Sum of electronic and zero-point Energies=   | -372.860348 |
| Sum of electronic and thermal Energies=      | -372.852785 |
| Sum of electronic and thermal Enthalpies=    | -372.851840 |
| Sum of electronic and thermal Free Energies= | -372.893302 |

|   |             |             |             |
|---|-------------|-------------|-------------|
| N | -0.77633600 | -0.68670800 | -0.01422400 |
| H | -0.09841200 | -1.41694200 | 0.11292100  |
| C | -2.18634300 | -1.04566000 | 0.00498900  |
| H | -2.71805400 | -0.49959400 | -0.77068400 |
| H | -2.27429100 | -2.11236900 | -0.18545500 |
| H | -2.64787700 | -0.81268500 | 0.96540900  |
| C | -0.40100600 | 0.61891300  | 0.00228500  |
| O | -1.16541000 | 1.54851300  | -0.02224900 |
| N | 1.01783100  | 0.88408900  | 0.03942100  |
| N | 1.80293900  | -0.06178700 | 0.00266500  |
| N | 2.61070900  | -0.84788500 | -0.02612500 |

**CBS-QB3**

|                   |             |                      |             |
|-------------------|-------------|----------------------|-------------|
| Temperature=      | 298.150000  | Pressure=            | 1.000000    |
| E(ZPE)=           | 0.076498    | E(Thermal)=          | 0.084039    |
| E(SCF)=           | -370.778300 | DE(MP2)=             | -1.359672   |
| DE(CBS)=          | -0.129662   | DE(MP34)=            | -0.015336   |
| DE(CCSO)=         | -0.043772   | DE(Int)=             | 0.042013    |
| DE(Empirical)=    | -0.059262   |                      |             |
| CBS-QB3 (0 K)=    | -372.267493 | CBS-QB3 Energy=      | -372.259953 |
| CBS-QB3 Enthalpy= | -372.259008 | CBS-QB3 Free Energy= | -372.300677 |

|   |             |             |             |
|---|-------------|-------------|-------------|
| N | -0.78294700 | -0.68017000 | -0.00345700 |
| H | -0.09023700 | -1.40951100 | 0.04401300  |
| C | -2.18604200 | -1.06998700 | 0.00145100  |
| H | -2.78181700 | -0.16681500 | -0.11194100 |
| H | -2.39979300 | -1.74694200 | -0.82934300 |
| H | -2.45825600 | -1.55814700 | 0.94168300  |
| C | -0.40784200 | 0.63083700  | 0.00145900  |
| O | -1.15815900 | 1.57242200  | -0.01097300 |
| N | 1.01915600  | 0.88382800  | 0.01821700  |
| N | 1.80069200  | -0.06935800 | 0.00146900  |
| N | 2.61433900  | -0.85759400 | -0.01252800 |



**B3LYP/aug-cc-pVTZ**

|                                              |             |             |             |
|----------------------------------------------|-------------|-------------|-------------|
| Zero-point correction=                       |             |             | 0.077112    |
| Thermal correction to Energy=                |             |             | 0.084665    |
| Thermal correction to Enthalpy=              |             |             | 0.085609    |
| Thermal correction to Gibbs Free Energy=     |             |             | 0.044245    |
| Sum of electronic and zero-point Energies=   |             |             | -372.868032 |
| Sum of electronic and thermal Energies=      |             |             | -372.860480 |
| Sum of electronic and thermal Enthalpies=    |             |             | -372.859536 |
| Sum of electronic and thermal Free Energies= |             |             | -372.900899 |
| N                                            | -0.77717900 | -0.68692800 | -0.01383600 |
| H                                            | -0.09974000 | -1.41713200 | 0.11217100  |
| C                                            | -2.18748200 | -1.04616700 | 0.00497800  |
| H                                            | -2.71915600 | -0.50029600 | -0.77113700 |
| H                                            | -2.27477200 | -2.11316200 | -0.18537700 |
| H                                            | -2.64953200 | -0.81314400 | 0.96538400  |
| C                                            | -0.40097200 | 0.61895200  | 0.00222400  |
| O                                            | -1.16564700 | 1.55009900  | -0.02172300 |
| N                                            | 1.01859800  | 0.88366300  | 0.03854000  |
| N                                            | 1.80360200  | -0.06240000 | 0.00244900  |
| N                                            | 2.61199500  | -0.84773000 | -0.02579200 |

***anti-anti* Me(H)NC(O)N<sub>3</sub>****B3LYP/6-311++G(3df,3pd)**

|                                              |             |             |             |
|----------------------------------------------|-------------|-------------|-------------|
| Zero-point correction=                       |             |             | 0.077712    |
| Thermal correction to Energy=                |             |             | 0.084921    |
| Thermal correction to Enthalpy=              |             |             | 0.085865    |
| Thermal correction to Gibbs Free Energy=     |             |             | 0.045839    |
| Sum of electronic and zero-point Energies=   |             |             | -372.854027 |
| Sum of electronic and thermal Energies=      |             |             | -372.846818 |
| Sum of electronic and thermal Enthalpies=    |             |             | -372.845874 |
| Sum of electronic and thermal Free Energies= |             |             | -372.885900 |
| N                                            | 0.99669200  | 0.84129500  | -0.27018400 |
| H                                            | 1.91016400  | 1.09476200  | -0.61074300 |
| C                                            | 0.12719500  | 1.91435800  | 0.19459700  |
| H                                            | -0.30310200 | 1.67180600  | 1.16478300  |
| H                                            | 0.72507100  | 2.81496600  | 0.31226100  |
| H                                            | -0.67993600 | 2.12943800  | -0.50663700 |
| C                                            | 0.90324200  | -0.48956200 | 0.00700500  |
| O                                            | 1.80410300  | -1.27457300 | -0.13417000 |
| N                                            | -0.36272300 | -0.94650300 | 0.53858900  |
| N                                            | -1.40132300 | -0.52488900 | 0.03093500  |
| N                                            | -2.41373800 | -0.23607000 | -0.37018700 |

**CBS-QB3**

|                   |             |                      |             |
|-------------------|-------------|----------------------|-------------|
| Temperature=      | 298.150000  | Pressure=            | 1.000000    |
| E(ZPE)=           | 0.076850    | E(Thermal)=          | 0.084167    |
| E(SCF)=           | -370.772078 | DE(MP2)=             | -1.361157   |
| DE(CBS)=          | -0.129479   | DE(MP34)=            | -0.015369   |
| DE(CCSO)=         | -0.043808   | DE(Int)=             | 0.042039    |
| DE(Empirical)=    | -0.059220   |                      |             |
| CBS-QB3 (0 K)=    | -372.262222 | CBS-QB3 Energy=      | -372.254904 |
| CBS-QB3 Enthalpy= | -372.253960 | CBS-QB3 Free Energy= | -372.294369 |
| N                 | 1.01854400  | 0.82230600           | -0.28182500 |
| H                 | 1.93528100  | 1.05270700           | -0.63465700 |
| C                 | 0.17987200  | 1.91797900           | 0.19660800  |
| H                 | -0.17358600 | 1.72746200           | 1.21222400  |
| H                 | 0.78171200  | 2.82639700           | 0.21570100  |
| H                 | -0.68310600 | 2.09626600           | -0.45081800 |
| C                 | 0.89518900  | -0.50731900          | 0.00792300  |
| O                 | 1.76906200  | -1.32101500          | -0.13797700 |
| N                 | -0.38385100 | -0.91344400          | 0.56617100  |
| N                 | -1.41505800 | -0.49743800          | 0.03176000  |
| N                 | -2.42865800 | -0.21123500          | -0.38265100 |

### B3LYP/aug-cc-pVTZ

|                                              |             |             |             |
|----------------------------------------------|-------------|-------------|-------------|
| Zero-point correction=                       |             |             | 0.077624    |
| Thermal correction to Energy=                |             |             | 0.084831    |
| Thermal correction to Enthalpy=              |             |             | 0.085775    |
| Thermal correction to Gibbs Free Energy=     |             |             | 0.045759    |
| Sum of electronic and zero-point Energies=   |             |             | -372.861535 |
| Sum of electronic and thermal Energies=      |             |             | -372.854328 |
| Sum of electronic and thermal Enthalpies=    |             |             | -372.853384 |
| Sum of electronic and thermal Free Energies= |             |             | -372.893400 |
| N                                            | 1.00224300  | 0.83803800  | -0.26746800 |
| H                                            | 1.91582400  | 1.08605200  | -0.61061000 |
| C                                            | 0.13735600  | 1.91692500  | 0.19283700  |
| H                                            | -0.29607300 | 1.67944300  | 1.16309300  |
| H                                            | 0.74018400  | 2.81472400  | 0.30892200  |
| H                                            | -0.66734500 | 2.13452000  | -0.51077300 |
| C                                            | 0.90057300  | -0.49264500 | 0.00755000  |
| O                                            | 1.79854800  | -1.28333600 | -0.13509800 |
| N                                            | -0.36757500 | -0.94508100 | 0.53905900  |
| N                                            | -1.40462200 | -0.51956800 | 0.03048400  |
| N                                            | -2.41698100 | -0.22963600 | -0.36952900 |

### CH<sub>3</sub>(H)NNCO

#### B3LYP/6-311++G(3df,3pd)

|                        |  |  |          |
|------------------------|--|--|----------|
| Zero-point correction= |  |  | 0.067675 |
|------------------------|--|--|----------|

|                                              |             |             |             |
|----------------------------------------------|-------------|-------------|-------------|
| Thermal correction to Energy=                |             |             | 0.073195    |
| Thermal correction to Enthalpy=              |             |             | 0.074139    |
| Thermal correction to Gibbs Free Energy=     |             |             | 0.038538    |
| Sum of electronic and zero-point Energies=   |             |             | -263.329742 |
| Sum of electronic and thermal Energies=      |             |             | -263.324222 |
| Sum of electronic and thermal Enthalpies=    |             |             | -263.323278 |
| Sum of electronic and thermal Free Energies= |             |             | -263.358879 |
| N                                            | 1.12575400  | -0.56323600 | -0.31162200 |
| C                                            | 1.79009500  | 0.68885000  | 0.06235000  |
| H                                            | 2.81620400  | 0.63435700  | -0.29878200 |
| H                                            | 1.29520100  | 1.52054300  | -0.43729900 |
| H                                            | 1.79302800  | 0.87231000  | 1.14123000  |
| H                                            | 1.63899500  | -1.34474700 | 0.07531900  |
| N                                            | -0.16016500 | -0.67105900 | 0.26538800  |
| C                                            | -1.18457000 | -0.07818800 | 0.02070200  |
| O                                            | -2.24196300 | 0.41170300  | -0.08189200 |

### M06-2X

|                                              |             |             |             |
|----------------------------------------------|-------------|-------------|-------------|
| Zero-point correction=                       |             |             | 0.068636    |
| Thermal correction to Energy=                |             |             | 0.074091    |
| Thermal correction to Enthalpy=              |             |             | 0.075035    |
| Thermal correction to Gibbs Free Energy=     |             |             | 0.039589    |
| Sum of electronic and zero-point Energies=   |             |             | -263.214171 |
| Sum of electronic and thermal Energies=      |             |             | -263.208716 |
| Sum of electronic and thermal Enthalpies=    |             |             | -263.207772 |
| Sum of electronic and thermal Free Energies= |             |             | -263.243218 |
| N                                            | 1.14540400  | -0.57034800 | -0.29344100 |
| C                                            | 1.70158300  | 0.73292200  | 0.06330500  |
| H                                            | 2.74373400  | 0.74549200  | -0.24768400 |
| H                                            | 1.16833300  | 1.50571500  | -0.48757500 |
| H                                            | 1.63322900  | 0.94496300  | 1.13317000  |
| H                                            | 1.68790100  | -1.30262400 | 0.14509800  |
| N                                            | -0.15024200 | -0.73491400 | 0.22518300  |
| C                                            | -1.15311200 | -0.09846600 | 0.01998900  |
| O                                            | -2.18626900 | 0.42956900  | -0.07062000 |

### B3PW91

|                                            |  |  |             |
|--------------------------------------------|--|--|-------------|
| Zero-point correction=                     |  |  | 0.067944    |
| Thermal correction to Energy=              |  |  | 0.073437    |
| Thermal correction to Enthalpy=            |  |  | 0.074382    |
| Thermal correction to Gibbs Free Energy=   |  |  | 0.038944    |
| Sum of electronic and zero-point Energies= |  |  | -263.221882 |
| Sum of electronic and thermal Energies=    |  |  | -263.216389 |
| Sum of electronic and thermal Enthalpies=  |  |  | -263.215444 |

|                                              |             |             |             |
|----------------------------------------------|-------------|-------------|-------------|
| Sum of electronic and thermal Free Energies= |             |             | -263.250882 |
| N                                            | 1.13538500  | -0.56756800 | -0.29353700 |
| C                                            | 1.75753900  | 0.70385600  | 0.05979500  |
| H                                            | 2.79585200  | 0.66558300  | -0.26966500 |
| H                                            | 1.25931600  | 1.51003900  | -0.47943800 |
| H                                            | 1.72498200  | 0.92110600  | 1.13314900  |
| H                                            | 1.65684100  | -1.32757800 | 0.12308200  |
| N                                            | -0.15416700 | -0.69143400 | 0.23815100  |
| C                                            | -1.17292500 | -0.08361700 | 0.01482400  |
| O                                            | -2.22665100 | 0.41530400  | -0.07089300 |

### CBS-QB3

|                   |             |                      |             |
|-------------------|-------------|----------------------|-------------|
| Temperature=      | 298.150000  | Pressure=            | 1.000000    |
| E(ZPE)=           | 0.066997    | E(Thermal)=          | 0.072546    |
| E(SCF)=           | -261.859533 | DE(MP2)=             | -0.951087   |
| DE(CBS)=          | -0.091651   | DE(MP34)=            | -0.024414   |
| DE(CCSO)=         | -0.028687   | DE(Int)=             | 0.030125    |
| DE(Empirical)=    | -0.043890   |                      |             |
| CBS-QB3 (0 K)=    | -262.902140 | CBS-QB3 Energy=      | -262.896590 |
| CBS-QB3 Enthalpy= | -262.895646 | CBS-QB3 Free Energy= | -262.931390 |
| N                 | -1.11168100 | -0.55798800          | -0.32805400 |
| H                 | -1.60490300 | -1.36351300          | 0.04227900  |
| C                 | -1.83825300 | 0.65917900           | 0.06080800  |
| H                 | -1.36320300 | 1.52537500           | -0.40431500 |
| H                 | -2.85274700 | 0.57335700           | -0.33458400 |
| H                 | -1.88087400 | 0.81723800           | 1.14596400  |
| N                 | 0.16084300  | -0.62197600          | 0.29824100  |
| C                 | 1.20232500  | -0.06863700          | 0.01946000  |
| O                 | 2.27164500  | 0.39550500           | -0.09028200 |

### B3LYP/aug-cc-pVTZ

|                                              |            |             |             |
|----------------------------------------------|------------|-------------|-------------|
| Zero-point correction=                       |            |             | 0.067559    |
| Thermal correction to Energy=                |            |             | 0.073083    |
| Thermal correction to Enthalpy=              |            |             | 0.074028    |
| Thermal correction to Gibbs Free Energy=     |            |             | 0.038457    |
| Sum of electronic and zero-point Energies=   |            |             | -263.334493 |
| Sum of electronic and thermal Energies=      |            |             | -263.328969 |
| Sum of electronic and thermal Enthalpies=    |            |             | -263.328024 |
| Sum of electronic and thermal Free Energies= |            |             | -263.363595 |
| N                                            | 1.13178400 | -0.56554000 | -0.30627000 |
| C                                            | 1.77931200 | 0.69721500  | 0.06232700  |
| H                                            | 2.80939200 | 0.65009800  | -0.28912200 |
| H                                            | 1.27976400 | 1.51851100  | -0.45019200 |
| H                                            | 1.77012500 | 0.89102700  | 1.13955000  |

|   |             |             |             |
|---|-------------|-------------|-------------|
| H | 1.64842200  | -1.33924500 | 0.09108300  |
| N | -0.16013200 | -0.68324100 | 0.25612600  |
| C | -1.18123100 | -0.08196200 | 0.01873100  |
| O | -2.23721900 | 0.41619500  | -0.07833300 |

***syn*-singlet Me(H)NC(O)N**

**B3LYP/6-311++G(3df,3pd)**

|                                              |             |             |             |
|----------------------------------------------|-------------|-------------|-------------|
| Zero-point correction=                       |             |             | 0.065985    |
| Thermal correction to Energy=                |             |             | 0.071797    |
| Thermal correction to Enthalpy=              |             |             | 0.072741    |
| Thermal correction to Gibbs Free Energy=     |             |             | 0.036727    |
| Sum of electronic and zero-point Energies=   |             |             | -263.263886 |
| Sum of electronic and thermal Energies=      |             |             | -263.258074 |
| Sum of electronic and thermal Enthalpies=    |             |             | -263.257130 |
| Sum of electronic and thermal Free Energies= |             |             | -263.293143 |
| N                                            | -0.82998000 | -0.46633100 | 0.00000000  |
| H                                            | -1.81697400 | -0.27233700 | 0.00000000  |
| C                                            | -0.36093300 | -1.84531900 | 0.00000000  |
| H                                            | 0.72553000  | -1.83957400 | 0.00000000  |
| H                                            | -0.70657100 | -2.37190500 | 0.88913600  |
| H                                            | -0.70657100 | -2.37190500 | -0.88913600 |
| C                                            | 0.00000000  | 0.57113600  | 0.00000000  |
| O                                            | 1.29433800  | 0.60687200  | 0.00000000  |
| N                                            | 0.01790500  | 1.84430800  | 0.00000000  |

**M06-2X**

|                                              |             |             |             |
|----------------------------------------------|-------------|-------------|-------------|
| Zero-point correction=                       |             |             | 0.066807    |
| Thermal correction to Energy=                |             |             | 0.072524    |
| Thermal correction to Enthalpy=              |             |             | 0.073468    |
| Thermal correction to Gibbs Free Energy=     |             |             | 0.037693    |
| Sum of electronic and zero-point Energies=   |             |             | -263.146772 |
| Sum of electronic and thermal Energies=      |             |             | -263.141054 |
| Sum of electronic and thermal Enthalpies=    |             |             | -263.140110 |
| Sum of electronic and thermal Free Energies= |             |             | -263.175886 |
| N                                            | -0.87200500 | -0.42757700 | 0.00000000  |
| H                                            | -1.84944900 | -0.19148100 | 0.00000000  |
| C                                            | -0.44740500 | -1.81793500 | 0.00000000  |
| H                                            | 0.63863300  | -1.83683000 | 0.00000000  |
| H                                            | -0.80796300 | -2.33039900 | 0.88910700  |
| H                                            | -0.80796300 | -2.33039900 | -0.88910700 |
| C                                            | 0.00000000  | 0.56578500  | 0.00000000  |
| O                                            | 1.30072600  | 0.56046200  | 0.00000000  |
| N                                            | 0.17277100  | 1.81590700  | 0.00000000  |

**B3PW91**

|                                              |             |             |             |
|----------------------------------------------|-------------|-------------|-------------|
| Zero-point correction=                       |             |             | 0.066296    |
| Thermal correction to Energy=                |             |             | 0.072071    |
| Thermal correction to Enthalpy=              |             |             | 0.073015    |
| Thermal correction to Gibbs Free Energy=     |             |             | 0.037159    |
| Sum of electronic and zero-point Energies=   |             |             | -263.156196 |
| Sum of electronic and thermal Energies=      |             |             | -263.150422 |
| Sum of electronic and thermal Enthalpies=    |             |             | -263.149477 |
| Sum of electronic and thermal Free Energies= |             |             | -263.185334 |
| N                                            | -0.84034700 | -0.45764300 | 0.00000000  |
| H                                            | -1.82418300 | -0.25113500 | 0.00000000  |
| C                                            | -0.38759600 | -1.83439800 | 0.00000000  |
| H                                            | 0.70007900  | -1.83904000 | 0.00000000  |
| H                                            | -0.73670200 | -2.36009000 | 0.88959700  |
| H                                            | -0.73670200 | -2.36009000 | -0.88959700 |
| C                                            | 0.00000000  | 0.56641800  | 0.00000000  |
| O                                            | 1.29428800  | 0.59688700  | 0.00000000  |
| N                                            | 0.06445800  | 1.83523300  | 0.00000000  |

**CBS-QB3**

|                   |             |                      |             |
|-------------------|-------------|----------------------|-------------|
| Temperature=      | 298.150000  | Pressure=            | 1.000000    |
| E(ZPE)=           | 0.065211    | E(Thermal)=          | 0.071129    |
| E(SCF)=           | -261.787786 | DE(MP2)=             | -0.949104   |
| DE(CBS)=          | -0.092396   | DE(MP34)=            | -0.033676   |
| DE(CCSO)=         | -0.032388   | DE(Int)=             | 0.030261    |
| DE(Empirical)=    | -0.043633   |                      |             |
| CBS-QB3 (0 K)=    | -262.843509 | CBS-QB3 Energy=      | -262.837592 |
| CBS-QB3 Enthalpy= | -262.836647 | CBS-QB3 Free Energy= | -262.873449 |
| N                 | 0.70344400  | -0.64570700          | -0.00010700 |
| H                 | 0.83386200  | -1.64477100          | 0.00007800  |
| C                 | 1.86116400  | 0.24168100           | 0.00004900  |
| H                 | 1.50333500  | 1.27031600           | -0.00002100 |
| H                 | 2.47260000  | 0.08600200           | 0.89198200  |
| H                 | 2.47284300  | 0.08596600           | -0.89170900 |
| C                 | -0.54586700 | -0.17923300          | -0.00001800 |
| O                 | -0.97211700 | 1.04415400           | -0.00002600 |
| N                 | -1.76022600 | -0.57221200          | 0.00006300  |

**B3LYP/aug-cc-pVTZ**

|                                            |  |             |
|--------------------------------------------|--|-------------|
| Zero-point correction=                     |  | 0.065945    |
| Thermal correction to Energy=              |  | 0.071737    |
| Thermal correction to Enthalpy=            |  | 0.072681    |
| Thermal correction to Gibbs Free Energy=   |  | 0.036793    |
| Sum of electronic and zero-point Energies= |  | -263.269478 |

|                                              |             |             |             |
|----------------------------------------------|-------------|-------------|-------------|
| Sum of electronic and thermal Energies=      |             |             | -263.263687 |
| Sum of electronic and thermal Enthalpies=    |             |             | -263.262742 |
| Sum of electronic and thermal Free Energies= |             |             | -263.298630 |
| N                                            | -0.83189000 | -0.46529400 | 0.00000000  |
| H                                            | -1.81799000 | -0.26887000 | 0.00000000  |
| C                                            | -0.36606900 | -1.84575200 | 0.00000000  |
| H                                            | 0.72063000  | -1.84233300 | 0.00000000  |
| H                                            | -0.71318100 | -2.37166000 | 0.88916900  |
| H                                            | -0.71318100 | -2.37166000 | -0.88916900 |
| C                                            | 0.00000000  | 0.57090700  | 0.00000000  |
| O                                            | 1.29720800  | 0.60618700  | 0.00000000  |
| N                                            | 0.02367200  | 1.84445000  | 0.00000000  |

***syn*-triplet Me(H)NC(O)N**

**B3LYP/6-311++G(3df,3pd)**

|                                              |             |             |             |
|----------------------------------------------|-------------|-------------|-------------|
| Zero-point correction=                       |             |             | 0.065292    |
| Thermal correction to Energy=                |             |             | 0.071092    |
| Thermal correction to Enthalpy=              |             |             | 0.072036    |
| Thermal correction to Gibbs Free Energy=     |             |             | 0.034481    |
| Sum of electronic and zero-point Energies=   |             |             | -263.280640 |
| Sum of electronic and thermal Energies=      |             |             | -263.274839 |
| Sum of electronic and thermal Enthalpies=    |             |             | -263.273895 |
| Sum of electronic and thermal Free Energies= |             |             | -263.311450 |
| N                                            | -0.56743800 | -0.61990900 | -0.01355100 |
| H                                            | -0.53862100 | -1.62539100 | 0.03023000  |
| C                                            | -1.84744100 | 0.06430400  | 0.00460400  |
| H                                            | -1.70215100 | 1.07693700  | -0.36100200 |
| H                                            | -2.55262300 | -0.45512000 | -0.64166700 |
| H                                            | -2.26080700 | 0.11552000  | 1.01395900  |
| C                                            | 0.61816600  | 0.03891900  | -0.00056900 |
| O                                            | 0.76540600  | 1.25416300  | -0.00056200 |
| N                                            | 1.75409600  | -0.77503200 | 0.00480400  |

**M06-2X**

|                                              |             |             |             |
|----------------------------------------------|-------------|-------------|-------------|
| Zero-point correction=                       |             |             | 0.066198    |
| Thermal correction to Energy=                |             |             | 0.071939    |
| Thermal correction to Enthalpy=              |             |             | 0.072883    |
| Thermal correction to Gibbs Free Energy=     |             |             | 0.036219    |
| Sum of electronic and zero-point Energies=   |             |             | -263.164437 |
| Sum of electronic and thermal Energies=      |             |             | -263.158697 |
| Sum of electronic and thermal Enthalpies=    |             |             | -263.157752 |
| Sum of electronic and thermal Free Energies= |             |             | -263.194416 |
| N                                            | -0.54473400 | -0.64324200 | -0.01272800 |
| H                                            | -0.50033700 | -1.64705000 | 0.02414100  |

|   |             |             |             |
|---|-------------|-------------|-------------|
| C | -1.81991400 | 0.04508300  | 0.00452000  |
| H | -1.85264500 | 0.77949300  | -0.79755600 |
| H | -2.61384200 | -0.68122300 | -0.13555500 |
| H | -1.96646900 | 0.56603900  | 0.95006600  |
| C | 0.61090800  | 0.05580800  | -0.00138000 |
| O | 0.69880000  | 1.26438600  | -0.00030600 |
| N | 1.77286700  | -0.74785700 | 0.00451500  |

### B3PW91

|                                              |             |             |             |
|----------------------------------------------|-------------|-------------|-------------|
| Zero-point correction=                       |             |             | 0.065566    |
| Thermal correction to Energy=                |             |             | 0.071335    |
| Thermal correction to Enthalpy=              |             |             | 0.072279    |
| Thermal correction to Gibbs Free Energy=     |             |             | 0.034874    |
| Sum of electronic and zero-point Energies=   |             |             | -263.173504 |
| Sum of electronic and thermal Energies=      |             |             | -263.167735 |
| Sum of electronic and thermal Enthalpies=    |             |             | -263.166791 |
| Sum of electronic and thermal Free Energies= |             |             | -263.204196 |
| N                                            | 0.56772800  | -0.61532400 | 0.00012500  |
| H                                            | 0.53623100  | -1.62133400 | 0.00001800  |
| C                                            | 1.84237800  | 0.06293200  | -0.00005500 |
| H                                            | 1.65249000  | 1.13355600  | -0.00169500 |
| H                                            | 2.42166700  | -0.19322700 | 0.88894600  |
| H                                            | 2.42264200  | -0.19586900 | -0.88763000 |
| C                                            | -0.61554200 | 0.04216800  | 0.00002900  |
| O                                            | -0.76876100 | 1.25323500  | 0.00000800  |
| N                                            | -1.74543700 | -0.78176200 | -0.00006000 |

### CBS-QB3

|                   |             |                      |             |
|-------------------|-------------|----------------------|-------------|
| Temperature=      | 298.150000  | Pressure=            | 1.000000    |
| E(ZPE)=           | 0.064735    | E(Thermal)=          | 0.070480    |
| E(SCF)=           | -261.866804 | DE(MP2)=             | -0.876508   |
| DE(CBS)=          | -0.088959   | DE(MP34)=            | -0.041551   |
| DE(CCSD)=         | -0.026785   | DE(Int)=             | 0.027960    |
| DE(Empirical)=    | -0.041927   |                      |             |
| CBS-QB3 (0 K)=    | -262.849840 | CBS-QB3 Energy=      | -262.844094 |
| CBS-QB3 Enthalpy= | -262.843150 | CBS-QB3 Free Energy= | -262.880056 |
| N                 | -0.57028700 | -0.62035100          | -0.00005500 |
| H                 | -0.54214500 | -1.62869100          | 0.00010100  |
| C                 | -1.85236400 | 0.06516400           | 0.00001900  |
| H                 | -1.65630800 | 1.13593800           | -0.00115300 |
| H                 | -2.43339700 | -0.19199300          | -0.88993800 |
| H                 | -2.43241900 | -0.19016100          | 0.89115800  |
| C                 | 0.61983700  | 0.04008600           | -0.00000200 |
| O                 | 0.77146700  | 1.25629800           | -0.00000500 |



|   |            |             |            |
|---|------------|-------------|------------|
| N | 1.75424400 | -0.78064600 | 0.00002200 |
|---|------------|-------------|------------|

**B3LYP/aug-cc-pVTZ**

|                                              |             |             |             |
|----------------------------------------------|-------------|-------------|-------------|
| Zero-point correction=                       |             |             | 0.065185    |
| Thermal correction to Energy=                |             |             | 0.071008    |
| Thermal correction to Enthalpy=              |             |             | 0.071952    |
| Thermal correction to Gibbs Free Energy=     |             |             | 0.034059    |
| Sum of electronic and zero-point Energies=   |             |             | -263.285742 |
| Sum of electronic and thermal Energies=      |             |             | -263.279920 |
| Sum of electronic and thermal Enthalpies=    |             |             | -263.278976 |
| Sum of electronic and thermal Free Energies= |             |             | -263.316869 |
| N                                            | -0.56796600 | -0.61975700 | -0.01288600 |
| H                                            | -0.53929200 | -1.62484700 | 0.03021100  |
| C                                            | -1.84841500 | 0.06436300  | 0.00461700  |
| H                                            | -1.70306600 | 1.07719600  | -0.36100200 |
| H                                            | -2.55317200 | -0.45554400 | -0.64207300 |
| H                                            | -2.26230100 | 0.11558600  | 1.01401000  |
| C                                            | 0.61837200  | 0.03874500  | -0.00040800 |
| O                                            | 0.76662200  | 1.25536700  | -0.00062200 |
| N                                            | 1.75441100  | -0.77652400 | 0.00411100  |

**anti-singlet Me(H)NC(O)N**

**B3LYP/6-311++G(3df,3pd)**

|                                              |             |             |             |
|----------------------------------------------|-------------|-------------|-------------|
| Zero-point correction=                       |             |             | 0.065924    |
| Thermal correction to Energy=                |             |             | 0.071745    |
| Thermal correction to Enthalpy=              |             |             | 0.072689    |
| Thermal correction to Gibbs Free Energy=     |             |             | 0.036854    |
| Sum of electronic and zero-point Energies=   |             |             | -263.264309 |
| Sum of electronic and thermal Energies=      |             |             | -263.258487 |
| Sum of electronic and thermal Enthalpies=    |             |             | -263.257543 |
| Sum of electronic and thermal Free Energies= |             |             | -263.293378 |
| N                                            | -0.70829400 | -0.57746600 | -0.05106700 |
| H                                            | -0.75097100 | -1.57632500 | 0.06812400  |
| C                                            | -1.92547400 | 0.21851400  | 0.02247300  |
| H                                            | -1.73325700 | 1.19909700  | -0.40691900 |
| H                                            | -2.70789800 | -0.26066400 | -0.56142400 |
| H                                            | -2.26944700 | 0.34597000  | 1.04990600  |
| C                                            | 0.50057000  | -0.02919400 | -0.00901700 |
| O                                            | 1.67815100  | -0.56703400 | 0.02183800  |
| N                                            | 1.07769200  | 1.10493500  | -0.00680900 |

**M06-2X**

|                               |  |  |          |
|-------------------------------|--|--|----------|
| Zero-point correction=        |  |  | 0.066929 |
| Thermal correction to Energy= |  |  | 0.072601 |

|                                              |             |             |             |
|----------------------------------------------|-------------|-------------|-------------|
| Thermal correction to Enthalpy=              |             |             | 0.073545    |
| Thermal correction to Gibbs Free Energy=     |             |             | 0.038182    |
| Sum of electronic and zero-point Energies=   |             |             | -263.146723 |
| Sum of electronic and thermal Energies=      |             |             | -263.141052 |
| Sum of electronic and thermal Enthalpies=    |             |             | -263.140108 |
| Sum of electronic and thermal Free Energies= |             |             | -263.175470 |
| N                                            | -0.72593200 | -0.57674500 | -0.03993800 |
| H                                            | -0.77402700 | -1.57762700 | 0.05440200  |
| C                                            | -1.92766400 | 0.23750100  | 0.01772200  |
| H                                            | -1.66690000 | 1.25051800  | -0.27740800 |
| H                                            | -2.66746700 | -0.14548800 | -0.67975700 |
| H                                            | -2.34835400 | 0.26007800  | 1.02155300  |
| C                                            | 0.47756000  | -0.03361800 | -0.00744300 |
| O                                            | 1.67372800  | -0.54191700 | 0.01757500  |
| N                                            | 1.12129600  | 1.05168200  | -0.00592900 |

### B3PW91

|                                              |             |             |             |
|----------------------------------------------|-------------|-------------|-------------|
| Zero-point correction=                       |             |             | 0.066216    |
| Thermal correction to Energy=                |             |             | 0.072022    |
| Thermal correction to Enthalpy=              |             |             | 0.072966    |
| Thermal correction to Gibbs Free Energy=     |             |             | 0.037145    |
| Sum of electronic and zero-point Energies=   |             |             | -263.156556 |
| Sum of electronic and thermal Energies=      |             |             | -263.150750 |
| Sum of electronic and thermal Enthalpies=    |             |             | -263.149806 |
| Sum of electronic and thermal Free Energies= |             |             | -263.185627 |
| N                                            | -0.71565000 | -0.57301100 | -0.04724300 |
| H                                            | -0.76227900 | -1.57197500 | 0.06384200  |
| C                                            | -1.92358400 | 0.22465500  | 0.02078800  |
| H                                            | -1.70882200 | 1.22258300  | -0.35691100 |
| H                                            | -2.69276200 | -0.21789900 | -0.61011500 |
| H                                            | -2.30074400 | 0.31045100  | 1.04187500  |
| C                                            | 0.49166300  | -0.03047000 | -0.00821800 |
| O                                            | 1.67211500  | -0.56157300 | 0.02013300  |
| N                                            | 1.09839500  | 1.08505500  | -0.00635300 |

### CBS-QB3

|                   |             |                      |             |
|-------------------|-------------|----------------------|-------------|
| Temperature=      | 298.150000  | Pressure=            | 1.000000    |
| E(ZPE)=           | 0.065260    | E(Thermal)=          | 0.071074    |
| E(SCF)=           | -261.787861 | DE(MP2)=             | -0.949505   |
| DE(CBS)=          | -0.092274   | DE(MP34)=            | -0.033510   |
| DE(CCSB)=         | -0.032520   | DE(Int)=             | 0.030238    |
| DE(Empirical)=    | -0.043611   |                      |             |
| CBS-QB3 (0 K)=    | -262.843783 | CBS-QB3 Energy=      | -262.837970 |
| CBS-QB3 Enthalpy= | -262.837026 | CBS-QB3 Free Energy= | -262.872707 |

|   |             |             |             |
|---|-------------|-------------|-------------|
| N | -0.70581100 | -0.58669500 | -0.06818100 |
| H | -0.74766100 | -1.58153700 | 0.09339600  |
| C | -1.91992200 | 0.21625500  | 0.02946800  |
| H | -1.74990000 | 1.17510900  | -0.46151900 |
| H | -2.73169400 | -0.29143800 | -0.49165300 |
| H | -2.21455700 | 0.39948700  | 1.06729800  |
| C | 0.50586400  | -0.03077600 | -0.01283900 |
| O | 1.68250900  | -0.56806200 | 0.02892600  |
| N | 1.05839400  | 1.11955100  | -0.00877600 |

### **B3LYP/aug-cc-pVTZ**

|                                              |             |             |             |
|----------------------------------------------|-------------|-------------|-------------|
| Zero-point correction=                       |             |             | 0.065856    |
| Thermal correction to Energy=                |             |             | 0.071682    |
| Thermal correction to Enthalpy=              |             |             | 0.072626    |
| Thermal correction to Gibbs Free Energy=     |             |             | 0.036757    |
| Sum of electronic and zero-point Energies=   |             |             | -263.269897 |
| Sum of electronic and thermal Energies=      |             |             | -263.264071 |
| Sum of electronic and thermal Enthalpies=    |             |             | -263.263127 |
| Sum of electronic and thermal Free Energies= |             |             | -263.298996 |
| N                                            | -0.70980700 | -0.57695300 | -0.04887200 |
| H                                            | -0.75257400 | -1.57587500 | 0.06604000  |
| C                                            | -1.92775000 | 0.21904400  | 0.02150600  |
| H                                            | -1.73467300 | 1.19932300  | -0.40865700 |
| H                                            | -2.70900800 | -0.26170300 | -0.56306100 |
| H                                            | -2.27312700 | 0.34748500  | 1.04852200  |
| C                                            | 0.49919400  | -0.02884400 | -0.00838700 |
| O                                            | 1.68035700  | -0.56670400 | 0.02078000  |
| N                                            | 1.08093000  | 1.10312400  | -0.00652800 |

### ***anti*-triplet Me(H)NC(O)N**

#### **B3LYP/6-311++G(3df,3pd)**

|                                              |             |             |             |
|----------------------------------------------|-------------|-------------|-------------|
| Zero-point correction=                       |             |             | 0.065433    |
| Thermal correction to Energy=                |             |             | 0.071113    |
| Thermal correction to Enthalpy=              |             |             | 0.072057    |
| Thermal correction to Gibbs Free Energy=     |             |             | 0.035301    |
| Sum of electronic and zero-point Energies=   |             |             | -263.277310 |
| Sum of electronic and thermal Energies=      |             |             | -263.271629 |
| Sum of electronic and thermal Enthalpies=    |             |             | -263.270685 |
| Sum of electronic and thermal Free Energies= |             |             | -263.307442 |
| N                                            | -0.62157500 | -0.56528100 | 0.00000000  |
| H                                            | -1.62937600 | -0.52251700 | 0.00000000  |
| C                                            | 0.02831200  | -1.86466900 | 0.00000000  |
| H                                            | 1.10599200  | -1.72739600 | 0.00000000  |
| H                                            | -0.24679500 | -2.43646200 | 0.88716300  |

|   |             |             |             |
|---|-------------|-------------|-------------|
| H | -0.24679500 | -2.43646200 | -0.88716300 |
| C | 0.00000000  | 0.63816600  | 0.00000000  |
| O | -0.57112100 | 1.72469400  | 0.00000000  |
| N | 1.39529900  | 0.66304000  | 0.00000000  |

#### M06-2X

|                                              |             |             |             |
|----------------------------------------------|-------------|-------------|-------------|
| Zero-point correction=                       |             |             | 0.066654    |
| Thermal correction to Energy=                |             |             | 0.072184    |
| Thermal correction to Enthalpy=              |             |             | 0.073128    |
| Thermal correction to Gibbs Free Energy=     |             |             | 0.036868    |
| Sum of electronic and zero-point Energies=   |             |             | -263.160713 |
| Sum of electronic and thermal Energies=      |             |             | -263.155184 |
| Sum of electronic and thermal Enthalpies=    |             |             | -263.154239 |
| Sum of electronic and thermal Free Energies= |             |             | -263.190499 |
| N                                            | -0.56489100 | -0.61696900 | 0.00007800  |
| H                                            | -0.53278200 | -1.62459700 | 0.00002400  |
| C                                            | -1.85107600 | 0.05191200  | -0.00003300 |
| H                                            | -1.69566100 | 1.12670400  | -0.00053100 |
| H                                            | -2.42475900 | -0.21266100 | -0.88676000 |
| H                                            | -2.42456100 | -0.21188600 | 0.88705600  |
| C                                            | 0.64650700  | -0.01718600 | 0.00000200  |
| O                                            | 1.71417200  | -0.59279300 | -0.00003600 |
| N                                            | 0.64943400  | 1.39645900  | 0.00002000  |

#### B3PW91

|                                              |             |             |             |
|----------------------------------------------|-------------|-------------|-------------|
| Zero-point correction=                       |             |             | 0.065679    |
| Thermal correction to Energy=                |             |             | 0.071348    |
| Thermal correction to Enthalpy=              |             |             | 0.072292    |
| Thermal correction to Gibbs Free Energy=     |             |             | 0.035582    |
| Sum of electronic and zero-point Energies=   |             |             | -263.170199 |
| Sum of electronic and thermal Energies=      |             |             | -263.164529 |
| Sum of electronic and thermal Enthalpies=    |             |             | -263.163585 |
| Sum of electronic and thermal Free Energies= |             |             | -263.200296 |
| N                                            | -0.57509600 | -0.61126100 | 0.00017000  |
| H                                            | -0.55026300 | -1.61904400 | 0.00015600  |
| C                                            | -1.85480300 | 0.06229000  | -0.00006700 |
| H                                            | -1.69401300 | 1.13804400  | -0.00091700 |
| H                                            | -2.43374700 | -0.19880500 | -0.88783000 |
| H                                            | -2.43346200 | -0.19745500 | 0.88828300  |
| C                                            | 0.63642700  | -0.01325100 | -0.00010500 |
| O                                            | 1.71063800  | -0.60078800 | -0.00004600 |
| N                                            | 0.68033100  | 1.38116500  | 0.00007300  |

#### CBS-QB3

|                   |             |                      |             |
|-------------------|-------------|----------------------|-------------|
| Temperature=      | 298.150000  | Pressure=            | 1.000000    |
| E(ZPE)=           | 0.064798    | E(Thermal)=          | 0.070506    |
| E(SCF)=           | -261.863018 | DE(MP2)=             | -0.875247   |
| DE(CBS)=          | -0.088969   | DE(MP34)=            | -0.042432   |
| DE(CCSO)=         | -0.027363   | DE(Int)=             | 0.027881    |
| DE(Empirical)=    | -0.042083   |                      |             |
| CBS-QB3 (0 K)=    | -262.846433 | CBS-QB3 Energy=      | -262.840725 |
| CBS-QB3 Enthalpy= | -262.839781 | CBS-QB3 Free Energy= | -262.876667 |
| N                 | -0.62521200 | -0.56605900          | 0.00000000  |
| H                 | -1.63472100 | -0.52288800          | 0.00000000  |
| C                 | 0.02740100  | -1.86718900          | 0.00000000  |
| H                 | 1.10739900  | -1.72587600          | 0.00000000  |
| H                 | -0.24473700 | -2.44139000          | 0.89005000  |
| H                 | -0.24473700 | -2.44139000          | -0.89005000 |
| C                 | 0.00000000  | 0.64054400           | 0.00000000  |
| O                 | -0.56946900 | 1.72930500           | 0.00000000  |
| N                 | 1.39780400  | 0.65991200           | 0.00000000  |

### B3LYP/aug-cc-pVTZ

|                                              |             |             |             |
|----------------------------------------------|-------------|-------------|-------------|
| Zero-point correction=                       |             |             | 0.065332    |
| Thermal correction to Energy=                |             |             | 0.071027    |
| Thermal correction to Enthalpy=              |             |             | 0.071972    |
| Thermal correction to Gibbs Free Energy=     |             |             | 0.035144    |
| Sum of electronic and zero-point Energies=   |             |             | -263.282392 |
| Sum of electronic and thermal Energies=      |             |             | -263.276696 |
| Sum of electronic and thermal Enthalpies=    |             |             | -263.275752 |
| Sum of electronic and thermal Free Energies= |             |             | -263.312580 |
| N                                            | -0.62135000 | -0.56593100 | 0.00000000  |
| H                                            | -1.62882500 | -0.52314900 | 0.00000000  |
| C                                            | 0.02848800  | -1.86585700 | 0.00000000  |
| H                                            | 1.10634700  | -1.72882700 | 0.00000000  |
| H                                            | -0.24628300 | -2.43752700 | 0.88738600  |
| H                                            | -0.24628300 | -2.43752700 | -0.88738600 |
| C                                            | 0.00000000  | 0.63814600  | 0.00000000  |
| O                                            | -0.57225300 | 1.72579800  | 0.00000000  |
| N                                            | 1.39594100  | 0.66406100  | 0.00000000  |

### CH<sub>3</sub>NCO

#### B3LYP/6-311++G(3df,3pd)

|                                            |  |  |             |
|--------------------------------------------|--|--|-------------|
| Zero-point correction=                     |  |  | 0.050556    |
| Thermal correction to Energy=              |  |  | 0.055283    |
| Thermal correction to Enthalpy=            |  |  | 0.056227    |
| Thermal correction to Gibbs Free Energy=   |  |  | 0.022958    |
| Sum of electronic and zero-point Energies= |  |  | -208.020477 |

|                                              |             |             |             |
|----------------------------------------------|-------------|-------------|-------------|
| Sum of electronic and thermal Energies=      |             |             | -208.015750 |
| Sum of electronic and thermal Enthalpies=    |             |             | -208.014806 |
| Sum of electronic and thermal Free Energies= |             |             | -208.048075 |
| C                                            | 1.32776600  | 1.12646700  | 0.00000000  |
| H                                            | 1.25822900  | 2.21122300  | 0.00000000  |
| H                                            | 1.88021800  | 0.81601500  | 0.88743100  |
| H                                            | 1.88021800  | 0.81601500  | -0.88743100 |
| N                                            | 0.00000000  | 0.57225100  | 0.00000000  |
| C                                            | -0.55447000 | -0.48750500 | 0.00000000  |
| O                                            | -1.20730500 | -1.46034700 | 0.00000000  |

### CBS-QB3

|                                              |             |             |             |
|----------------------------------------------|-------------|-------------|-------------|
| Zero-point correction=                       |             |             | 0.050573    |
| Thermal correction to Energy=                |             |             | 0.055275    |
| Thermal correction to Enthalpy=              |             |             | 0.056220    |
| Thermal correction to Gibbs Free Energy=     |             |             | 0.023213    |
| Sum of electronic and zero-point Energies=   |             |             | -207.999144 |
| Sum of electronic and thermal Energies=      |             |             | -207.994441 |
| Sum of electronic and thermal Enthalpies=    |             |             | -207.993497 |
| Sum of electronic and thermal Free Energies= |             |             | -208.026503 |
| C                                            | 1.33754100  | 1.11626200  | 0.00000000  |
| H                                            | 1.27999100  | 2.20448100  | 0.00000000  |
| H                                            | 1.88853100  | 0.79916300  | 0.88963900  |
| H                                            | 1.88853100  | 0.79916300  | -0.88963900 |
| N                                            | 0.00000000  | 0.57710300  | 0.00000000  |
| C                                            | -0.55839000 | -0.48375900 | 0.00000000  |
| O                                            | -1.21649500 | -1.45469400 | 0.00000000  |

### B3LYP/aug-cc-pVTZ

|                                              |             |             |             |
|----------------------------------------------|-------------|-------------|-------------|
| Zero-point correction=                       |             |             | 0.050499    |
| Thermal correction to Energy=                |             |             | 0.055217    |
| Thermal correction to Enthalpy=              |             |             | 0.056161    |
| Thermal correction to Gibbs Free Energy=     |             |             | 0.023034    |
| Sum of electronic and zero-point Energies=   |             |             | -208.024229 |
| Sum of electronic and thermal Energies=      |             |             | -208.019511 |
| Sum of electronic and thermal Enthalpies=    |             |             | -208.018567 |
| Sum of electronic and thermal Free Energies= |             |             | -208.051694 |
| C                                            | 1.32783600  | 1.12853700  | 0.00000000  |
| H                                            | 1.25632300  | 2.21337800  | 0.00000000  |
| H                                            | 1.87988100  | 0.81798000  | 0.88772200  |
| H                                            | 1.87988100  | 0.81798000  | -0.88772200 |
| N                                            | 0.00000000  | 0.57223700  | 0.00000000  |
| C                                            | -0.55394200 | -0.48789600 | 0.00000000  |
| O                                            | -1.20743100 | -1.46235500 | 0.00000000  |

**HN<sub>3</sub>****B3LYP/6-311++G(3df,3pd)**

|                                              |             |             |             |
|----------------------------------------------|-------------|-------------|-------------|
| Zero-point correction=                       |             |             | 0.021447    |
| Thermal correction to Energy=                |             |             | 0.024651    |
| Thermal correction to Enthalpy=              |             |             | 0.025596    |
| Thermal correction to Gibbs Free Energy=     |             |             | -0.001514   |
| Sum of electronic and zero-point Energies=   |             |             | -164.828789 |
| Sum of electronic and thermal Energies=      |             |             | -164.825585 |
| Sum of electronic and thermal Enthalpies=    |             |             | -164.824640 |
| Sum of electronic and thermal Free Energies= |             |             | -164.851750 |
| N                                            | 0.08051300  | -1.12125700 | 0.00000000  |
| H                                            | 1.05426500  | -1.41739000 | 0.00000000  |
| N                                            | 0.00000000  | 0.11115200  | 0.00000000  |
| N                                            | -0.23112300 | 1.21258900  | 0.00000000  |

**CBS-QB3**

|                                              |             |             |             |
|----------------------------------------------|-------------|-------------|-------------|
| Zero-point correction=                       |             |             | 0.021374    |
| Thermal correction to Energy=                |             |             | 0.024595    |
| Thermal correction to Enthalpy=              |             |             | 0.025539    |
| Thermal correction to Gibbs Free Energy=     |             |             | -0.001608   |
| Sum of electronic and zero-point Energies=   |             |             | -164.809164 |
| Sum of electronic and thermal Energies=      |             |             | -164.805943 |
| Sum of electronic and thermal Enthalpies=    |             |             | -164.804999 |
| Sum of electronic and thermal Free Energies= |             |             | -164.832146 |
| N                                            | 0.10298300  | -1.12297600 | 0.00000000  |
| H                                            | 1.08597000  | -1.39324200 | 0.00000000  |
| N                                            | 0.00000000  | 0.11035900  | 0.00000000  |
| N                                            | -0.25812200 | 1.21165200  | 0.00000000  |

**B3LYP/aug-cc-pVTZ**

|                                              |             |             |             |
|----------------------------------------------|-------------|-------------|-------------|
| Zero-point correction=                       |             |             | 0.021429    |
| Thermal correction to Energy=                |             |             | 0.024634    |
| Thermal correction to Enthalpy=              |             |             | 0.025578    |
| Thermal correction to Gibbs Free Energy=     |             |             | -0.001533   |
| Sum of electronic and zero-point Energies=   |             |             | -164.833036 |
| Sum of electronic and thermal Energies=      |             |             | -164.829832 |
| Sum of electronic and thermal Enthalpies=    |             |             | -164.828888 |
| Sum of electronic and thermal Free Energies= |             |             | -164.855999 |
| N                                            | 0.08406300  | -1.12118700 | 0.00000000  |
| H                                            | 1.05868700  | -1.41369800 | 0.00000000  |
| N                                            | 0.00000000  | 0.11126100  | 0.00000000  |
| N                                            | -0.23530400 | 1.21188200  | 0.00000000  |

**TS1****B3LYP/6-311++G(3df,3pd)**

|                                              |             |             |             |
|----------------------------------------------|-------------|-------------|-------------|
| Zero-point correction=                       |             |             | 0.077386    |
| Thermal correction to Energy=                |             |             | 0.083975    |
| Thermal correction to Enthalpy=              |             |             | 0.084920    |
| Thermal correction to Gibbs Free Energy=     |             |             | 0.046021    |
| Sum of electronic and zero-point Energies=   |             |             | -372.857120 |
| Sum of electronic and thermal Energies=      |             |             | -372.850530 |
| Sum of electronic and thermal Enthalpies=    |             |             | -372.849586 |
| Sum of electronic and thermal Free Energies= |             |             | -372.888485 |
| N                                            | 0.00000000  | 0.00000000  | 0.00000000  |
| H                                            | 0.00000000  | 0.00000000  | 1.00542500  |
| C                                            | 1.27044700  | 0.00000000  | -0.70872100 |
| H                                            | 1.13453100  | -0.45413500 | -1.68639200 |
| H                                            | 1.65626700  | 1.01131300  | -0.84877900 |
| H                                            | 1.99153100  | -0.58314800 | -0.14091400 |
| C                                            | -1.16116800 | 0.28567800  | -0.63041700 |
| O                                            | -1.29305500 | 0.50956000  | -1.80321100 |
| N                                            | -2.29655800 | 0.35950900  | 0.29414700  |
| N                                            | -2.74779800 | -0.70882500 | 0.69729800  |
| N                                            | -3.24920400 | -1.62842100 | 1.11579000  |

**CBS-QB3**

|                   |             |                      |             |
|-------------------|-------------|----------------------|-------------|
| Temperature=      | 298.150000  | Pressure=            | 1.000000    |
| E(ZPE)=           | 0.076600    | E(Thermal)=          | 0.083228    |
| E(SCF)=           | -370.775200 | DE(MP2)=             | -1.359246   |
| DE(CBS)=          | -0.129428   | DE(MP34)=            | -0.015957   |
| DE(CCSO)=         | -0.043657   | DE(Int)=             | 0.042004    |
| DE(Empirical)=    | -0.059241   |                      |             |
| CBS-QB3 (0 K)=    | -372.264124 | CBS-QB3 Energy=      | -372.257497 |
| CBS-QB3 Enthalpy= | -372.256552 | CBS-QB3 Free Energy= | -372.295610 |
| N                 | 0.00000000  | 0.00000000           | 0.00000000  |
| H                 | 0.00000000  | 0.00000000           | 1.00757800  |
| C                 | 1.27406200  | 0.00000000           | -0.70645800 |
| H                 | 1.06743700  | -0.06996500          | -1.77250300 |
| H                 | 1.83739400  | 0.91897400           | -0.51791400 |
| H                 | 1.87396200  | -0.85869800          | -0.39849800 |
| C                 | -1.17151000 | 0.26955800           | -0.62950600 |
| O                 | -1.32259700 | 0.48343400           | -1.80243600 |
| N                 | -2.29760400 | 0.33796600           | 0.31245000  |
| N                 | -2.71402700 | -0.73323900          | 0.75509100  |
| N                 | -3.19083700 | -1.65218900          | 1.21509700  |

**B3LYP/aug-cc-pVTZ**



|                                              |             |             |             |
|----------------------------------------------|-------------|-------------|-------------|
| Zero-point correction=                       |             |             | 0.077250    |
| Thermal correction to Energy=                |             |             | 0.083860    |
| Thermal correction to Enthalpy=              |             |             | 0.084805    |
| Thermal correction to Gibbs Free Energy=     |             |             | 0.045835    |
| Sum of electronic and zero-point Energies=   |             |             | -372.864820 |
| Sum of electronic and thermal Energies=      |             |             | -372.858210 |
| Sum of electronic and thermal Enthalpies=    |             |             | -372.857266 |
| Sum of electronic and thermal Free Energies= |             |             | -372.896236 |
| N                                            | 1.02800400  | -0.64194600 | 0.22231000  |
| H                                            | 0.62447000  | -1.37910800 | 0.77335100  |
| C                                            | 2.42405200  | -0.73814200 | -0.17712700 |
| H                                            | 2.56901500  | -0.19719700 | -1.10857200 |
| H                                            | 3.09069600  | -0.31334400 | 0.57565500  |
| H                                            | 2.67508700  | -1.78535300 | -0.32876000 |
| C                                            | 0.34252300  | 0.51891800  | 0.12098500  |
| O                                            | 0.76132200  | 1.55004900  | -0.33544900 |
| N                                            | -1.00399600 | 0.42885500  | 0.69533300  |
| N                                            | -1.84595700 | -0.16767900 | 0.02933300  |
| N                                            | -2.69937800 | -0.67780800 | -0.50286600 |

## TS2

### B3LYP/6-311++G(3df,3pd)

|                                              |             |             |             |
|----------------------------------------------|-------------|-------------|-------------|
| Zero-point correction=                       |             |             | 0.077050    |
| Thermal correction to Energy=                |             |             | 0.083397    |
| Thermal correction to Enthalpy=              |             |             | 0.084341    |
| Thermal correction to Gibbs Free Energy=     |             |             | 0.046436    |
| Sum of electronic and zero-point Energies=   |             |             | -372.840456 |
| Sum of electronic and thermal Energies=      |             |             | -372.834109 |
| Sum of electronic and thermal Enthalpies=    |             |             | -372.833165 |
| Sum of electronic and thermal Free Energies= |             |             | -372.871070 |
| N                                            | 0.00000000  | 0.00000000  | 0.00000000  |
| H                                            | 0.00000000  | 0.00000000  | 1.01480900  |
| C                                            | 1.39388100  | 0.00000000  | -0.48224300 |
| H                                            | 1.39410800  | 0.10376800  | -1.56635500 |
| H                                            | 1.89676400  | 0.86868500  | -0.06356300 |
| H                                            | 1.94720500  | -0.90335400 | -0.21253200 |
| C                                            | -0.71993500 | -1.15633600 | -0.42069400 |
| O                                            | -0.42546100 | -2.30002100 | -0.18726100 |
| N                                            | -1.85349500 | -0.77382300 | -1.17981800 |
| N                                            | -2.54570500 | -1.72361100 | -1.59319500 |
| N                                            | -3.24159300 | -2.49058700 | -2.01565500 |

### CBS-QB3

Temperature=

298.150000 Pressure=

1.000000

|                   |             |                      |             |
|-------------------|-------------|----------------------|-------------|
| E(ZPE)=           | 0.076295    | E(Thermal)=          | 0.082683    |
| E(SCF)=           | -370.766339 | DE(MP2)=             | -1.351980   |
| DE(CBS)=          | -0.128330   | DE(MP34)=            | -0.018766   |
| DE(CCSO)=         | -0.043184   | DE(Int)=             | 0.041679    |
| DE(Empirical)=    | -0.059258   |                      |             |
| CBS-QB3 (0 K)=    | -372.249883 | CBS-QB3 Energy=      | -372.243495 |
| CBS-QB3 Enthalpy= | -372.242551 | CBS-QB3 Free Energy= | -372.280549 |
| N                 | 0.00000000  | 0.00000000           | 0.00000000  |
| H                 | 0.00000000  | 0.00000000           | 1.01710300  |
| C                 | 1.39942900  | 0.00000000           | -0.47323200 |
| H                 | 1.40638200  | 0.09116700           | -1.56125700 |
| H                 | 1.89707900  | 0.87916800           | -0.06275900 |
| H                 | 1.95822100  | -0.89980900          | -0.19008500 |
| C                 | -0.70317100 | -1.17340100          | -0.41006900 |
| O                 | -0.39482000 | -2.31256200          | -0.16623900 |
| N                 | -1.84115400 | -0.80764700          | -1.17724400 |
| N                 | -2.52684700 | -1.76657300          | -1.58755600 |
| N                 | -3.22422100 | -2.53854900          | -2.01244400 |

### B3LYP/aug-cc-pVTZ

|                                              |             |             |             |
|----------------------------------------------|-------------|-------------|-------------|
| Zero-point correction=                       |             |             | 0.076928    |
| Thermal correction to Energy=                |             |             | 0.083286    |
| Thermal correction to Enthalpy=              |             |             | 0.084231    |
| Thermal correction to Gibbs Free Energy=     |             |             | 0.046301    |
| Sum of electronic and zero-point Energies=   |             |             | -372.848160 |
| Sum of electronic and thermal Energies=      |             |             | -372.841802 |
| Sum of electronic and thermal Enthalpies=    |             |             | -372.840857 |
| Sum of electronic and thermal Free Energies= |             |             | -372.878787 |
| N                                            | 1.53282900  | -0.45378200 | -0.50096700 |
| H                                            | 1.87360600  | -0.10239200 | -1.38958800 |
| C                                            | 2.53883300  | -0.18727100 | 0.54437400  |
| H                                            | 2.21861700  | -0.65840100 | 1.47283200  |
| H                                            | 3.47417700  | -0.65134900 | 0.23933600  |
| H                                            | 2.70559300  | 0.87779000  | 0.72644600  |
| C                                            | 0.28935000  | 0.19239300  | -0.23857300 |
| O                                            | 0.11965100  | 1.37743400  | -0.09589400 |
| N                                            | -0.74897000 | -0.76860900 | -0.15385300 |
| N                                            | -1.87783300 | -0.29323200 | 0.07576500  |
| N                                            | -2.93435400 | 0.01335900  | 0.27667200  |

### TS3

#### B3LYP/6-311++G(3df,3pd)

|                               |  |  |          |
|-------------------------------|--|--|----------|
| Zero-point correction=        |  |  | 0.077154 |
| Thermal correction to Energy= |  |  | 0.083460 |

|                                              |             |             |             |
|----------------------------------------------|-------------|-------------|-------------|
| Thermal correction to Enthalpy=              |             |             | 0.084404    |
| Thermal correction to Gibbs Free Energy=     |             |             | 0.046534    |
| Sum of electronic and zero-point Energies=   |             |             | -372.839753 |
| Sum of electronic and thermal Energies=      |             |             | -372.833447 |
| Sum of electronic and thermal Enthalpies=    |             |             | -372.832503 |
| Sum of electronic and thermal Free Energies= |             |             | -372.870373 |
| N                                            | 0.00000000  | 0.00000000  | 0.00000000  |
| H                                            | 0.00000000  | 0.00000000  | 1.01518200  |
| C                                            | 1.40003900  | 0.00000000  | -0.47018400 |
| H                                            | 1.41325700  | 0.08188200  | -1.55598900 |
| H                                            | 1.89613000  | 0.87726700  | -0.06127600 |
| H                                            | 1.94906700  | -0.89783600 | -0.17746200 |
| C                                            | -0.71285400 | -1.17979200 | -0.41501600 |
| O                                            | -0.40177000 | -2.30764700 | -0.15862100 |
| N                                            | -1.86420400 | -0.93074600 | -1.19441900 |
| N                                            | -2.14675200 | 0.25752900  | -1.42699700 |
| N                                            | -2.52787700 | 1.26917200  | -1.71815600 |

### CBS-QB3

|                   |             |                      |             |
|-------------------|-------------|----------------------|-------------|
| Temperature=      | 298.150000  | Pressure=            | 1.000000    |
| E(ZPE)=           | 0.076648    | E(Thermal)=          | 0.083229    |
| E(SCF)=           | -370.771062 | DE(MP2)=             | -1.360862   |
| DE(CBS)=          | -0.129548   | DE(MP34)=            | -0.015606   |
| DE(CCSDF)=        | -0.043668   | DE(Int)=             | 0.042059    |
| DE(Empirical)=    | -0.059230   |                      |             |
| CBS-QB3 (0 K)=    | -372.261269 | CBS-QB3 Energy=      | -372.254688 |
| CBS-QB3 Enthalpy= | -372.253744 | CBS-QB3 Free Energy= | -372.292440 |
| N                 | 0.00000000  | 0.00000000           | 0.00000000  |
| H                 | 0.00000000  | 0.00000000           | 1.01746700  |
| C                 | 1.40580700  | 0.00000000           | -0.46089000 |
| H                 | 1.42644300  | 0.06550800           | -1.55053700 |
| H                 | 1.89648100  | 0.88873300           | -0.06280200 |
| H                 | 1.95954800  | -0.89326300          | -0.15184400 |
| C                 | -0.69824800 | -1.19735500          | -0.40492200 |
| O                 | -0.37971900 | -2.31928300          | -0.12785400 |
| N                 | -1.84522600 | -0.96421600          | -1.20217400 |
| N                 | -2.12407800 | 0.22528200           | -1.45014200 |
| N                 | -2.50581800 | 1.23697500           | -1.75877100 |

### B3LYP/aug-cc-pVTZ

|                                          |          |
|------------------------------------------|----------|
| Zero-point correction=                   | 0.077033 |
| Thermal correction to Energy=            | 0.083352 |
| Thermal correction to Enthalpy=          | 0.084296 |
| Thermal correction to Gibbs Free Energy= | 0.046396 |

|                                              |             |             |             |
|----------------------------------------------|-------------|-------------|-------------|
| Sum of electronic and zero-point Energies=   |             |             | -372.847423 |
| Sum of electronic and thermal Energies=      |             |             | -372.841104 |
| Sum of electronic and thermal Enthalpies=    |             |             | -372.840159 |
| Sum of electronic and thermal Free Energies= |             |             | -372.878059 |
| N                                            | -0.75970700 | -0.64595700 | 0.53172200  |
| H                                            | -1.14479700 | -0.56695000 | 1.46747300  |
| C                                            | -1.75691100 | -1.30614100 | -0.33530600 |
| H                                            | -1.32430200 | -1.46460400 | -1.32221500 |
| H                                            | -1.98633200 | -2.28013000 | 0.09144300  |
| H                                            | -2.67864000 | -0.72958600 | -0.44285800 |
| C                                            | -0.45499900 | 0.69097100  | 0.09276900  |
| O                                            | -1.24778300 | 1.58286900  | -0.02799800 |
| N                                            | 0.90509600  | 0.91690600  | -0.21583600 |
| N                                            | 1.68724400  | -0.03819900 | -0.06540300 |
| N                                            | 2.50848000  | -0.79427300 | 0.01885500  |

#### TS4

##### B3LYP/6-311++G(3df,3pd)

|                                              |             |             |             |
|----------------------------------------------|-------------|-------------|-------------|
| Zero-point correction=                       |             |             | 0.077371    |
| Thermal correction to Energy=                |             |             | 0.083961    |
| Thermal correction to Enthalpy=              |             |             | 0.084905    |
| Thermal correction to Gibbs Free Energy=     |             |             | 0.045857    |
| Sum of electronic and zero-point Energies=   |             |             | -372.853562 |
| Sum of electronic and thermal Energies=      |             |             | -372.846972 |
| Sum of electronic and thermal Enthalpies=    |             |             | -372.846028 |
| Sum of electronic and thermal Free Energies= |             |             | -372.885077 |
| N                                            | 0.00000000  | 0.00000000  | 0.00000000  |
| H                                            | 0.00000000  | 0.00000000  | 1.00737800  |
| C                                            | 1.27632400  | 0.00000000  | -0.69837100 |
| H                                            | 1.22682200  | 0.63858300  | -1.57680200 |
| H                                            | 2.03526700  | 0.39795600  | -0.02896400 |
| H                                            | 1.58093200  | -1.00227300 | -1.00584300 |
| C                                            | -1.23809900 | -0.01304600 | -0.54632400 |
| O                                            | -2.26870100 | 0.01848900  | 0.07201900  |
| N                                            | -1.23472100 | 0.02428100  | -2.00914000 |
| N                                            | -1.02786300 | -1.03427100 | -2.59271300 |
| N                                            | -0.86382200 | -1.95327100 | -3.22627400 |

#### CBS-QB3

|              |             |             |           |
|--------------|-------------|-------------|-----------|
| Temperature= | 298.150000  | Pressure=   | 1.000000  |
| E(ZPE)=      | 0.076648    | E(Thermal)= | 0.083229  |
| E(SCF)=      | -370.771062 | DE(MP2)=    | -1.360862 |
| DE(CBS)=     | -0.129548   | DE(MP34)=   | -0.015606 |
| DE(CCSd)=    | -0.043668   | DE(Int)=    | 0.042059  |

|                   |             |                      |             |
|-------------------|-------------|----------------------|-------------|
| DE(Empirical)=    | -0.059230   |                      |             |
| CBS-QB3 (0 K)=    | -372.261269 | CBS-QB3 Energy=      | -372.254688 |
| CBS-QB3 Enthalpy= | -372.253744 | CBS-QB3 Free Energy= | -372.292440 |
| N                 | 0.00000000  | 0.00000000           | 0.00000000  |
| H                 | 0.00000000  | 0.00000000           | 1.00887200  |
| C                 | 1.27696900  | 0.00000000           | -0.70448200 |
| H                 | 1.29127400  | 0.76720200           | -1.47966800 |
| H                 | 2.06412100  | 0.22210700           | 0.01583900  |
| H                 | 1.49776200  | -0.96932200          | -1.16210200 |
| C                 | -1.23843700 | 0.06878000           | -0.55117100 |
| O                 | -2.27182000 | 0.14357500           | 0.05859400  |
| N                 | -1.21281000 | 0.12960200           | -2.01822800 |
| N                 | -1.03380300 | -0.93001900          | -2.61677000 |
| N                 | -0.88967600 | -1.84453500          | -3.27009600 |

### B3LYP/aug-cc-pVTZ

|                                              |             |             |             |
|----------------------------------------------|-------------|-------------|-------------|
| Zero-point correction=                       |             |             | 0.077285    |
| Thermal correction to Energy=                |             |             | 0.083866    |
| Thermal correction to Enthalpy=              |             |             | 0.084810    |
| Thermal correction to Gibbs Free Energy=     |             |             | 0.045878    |
| Sum of electronic and zero-point Energies=   |             |             | -372.861164 |
| Sum of electronic and thermal Energies=      |             |             | -372.854582 |
| Sum of electronic and thermal Enthalpies=    |             |             | -372.853638 |
| Sum of electronic and thermal Free Energies= |             |             | -372.892571 |
| N                                            | 1.38007600  | 0.35656400  | -0.22461100 |
| H                                            | 2.25116800  | 0.13988400  | -0.68091200 |
| C                                            | 1.07706900  | 1.74740500  | 0.07782900  |
| H                                            | 0.61908900  | 1.83128200  | 1.06063100  |
| H                                            | 2.00909000  | 2.30783000  | 0.08556600  |
| H                                            | 0.41251400  | 2.19748300  | -0.66248800 |
| C                                            | 0.61960700  | -0.73036300 | 0.04443000  |
| O                                            | 0.93204600  | -1.86977100 | -0.18689200 |
| N                                            | -0.62587400 | -0.41887200 | 0.74793000  |
| N                                            | -1.55471600 | 0.00954100  | 0.07082900  |
| N                                            | -2.47495500 | 0.39268700  | -0.45717800 |

### TS5

#### B3LYP/6-311++G(3df,3pd)

|                                            |  |  |             |
|--------------------------------------------|--|--|-------------|
| Zero-point correction=                     |  |  | 0.073074    |
| Thermal correction to Energy=              |  |  | 0.081193    |
| Thermal correction to Enthalpy=            |  |  | 0.082137    |
| Thermal correction to Gibbs Free Energy=   |  |  | 0.039557    |
| Sum of electronic and zero-point Energies= |  |  | -372.809931 |
| Sum of electronic and thermal Energies=    |  |  | -372.801813 |

|                                              |             |             |             |
|----------------------------------------------|-------------|-------------|-------------|
| Sum of electronic and thermal Enthalpies=    |             |             | -372.800869 |
| Sum of electronic and thermal Free Energies= |             |             | -372.843449 |
| N                                            | 0.00000000  | 0.00000000  | 0.00000000  |
| H                                            | 0.00000000  | 0.00000000  | 1.00306700  |
| C                                            | 1.26619900  | 0.00000000  | -0.71209700 |
| H                                            | 1.05112800  | 0.00017600  | -1.77753000 |
| H                                            | 1.85089300  | 0.88870700  | -0.47294400 |
| H                                            | 1.85083700  | -0.88883300 | -0.47323900 |
| C                                            | -1.17723200 | -0.00092600 | -0.65757900 |
| O                                            | -1.32587400 | -0.00148800 | -1.89614900 |
| N                                            | -2.42558900 | -0.00138700 | -0.19343400 |
| N                                            | -2.44945700 | -0.00060400 | 1.60823200  |
| N                                            | -3.09199300 | -0.00050600 | 2.49748100  |

### CBS-QB3

|                   |             |                      |             |
|-------------------|-------------|----------------------|-------------|
| Temperature=      | 298.150000  | Pressure=            | 1.000000    |
| E(ZPE)=           | 0.072385    | E(Thermal)=          | 0.080501    |
| E(SCF)=           | -370.745816 | DE(MP2)=             | -1.317475   |
| DE(CBS)=          | -0.126197   | DE(MP34)=            | -0.038485   |
| DE(CCSO)=         | -0.045425   | DE(Int)=             | 0.041503    |
| DE(Empirical)=    | -0.059225   |                      |             |
| CBS-QB3 (0 K)=    | -372.218735 | CBS-QB3 Energy=      | -372.210619 |
| CBS-QB3 Enthalpy= | -372.209674 | CBS-QB3 Free Energy= | -372.252108 |
| N                 | 0.00000000  | 0.00000000           | 0.00000000  |
| H                 | 0.00000000  | 0.00000000           | 1.00501300  |
| C                 | 1.26552900  | 0.00000000           | -0.71736100 |
| H                 | 1.04107000  | -0.00117200          | -1.78357900 |
| H                 | 1.85283200  | 0.89221200           | -0.48382600 |
| H                 | 1.85386100  | -0.89108800          | -0.48210000 |
| C                 | -1.17882400 | -0.00150000          | -0.66310900 |
| O                 | -1.32399200 | -0.00239800          | -1.90313500 |
| N                 | -2.42855300 | -0.00230000          | -0.19318700 |
| N                 | -2.45401700 | -0.00102800          | 1.60125400  |
| N                 | -3.12432700 | -0.00071300          | 2.47650100  |

### B3LYP/aug-cc-pVTZ

|                                              |             |
|----------------------------------------------|-------------|
| Zero-point correction=                       | 0.073054    |
| Thermal correction to Energy=                | 0.081129    |
| Thermal correction to Enthalpy=              | 0.082073    |
| Thermal correction to Gibbs Free Energy=     | 0.039813    |
| Sum of electronic and zero-point Energies=   | -372.818426 |
| Sum of electronic and thermal Energies=      | -372.810351 |
| Sum of electronic and thermal Enthalpies=    | -372.809407 |
| Sum of electronic and thermal Free Energies= | -372.851667 |

|   |             |             |             |
|---|-------------|-------------|-------------|
| N | 0.91938300  | -0.73625500 | 0.00000400  |
| H | 0.26498500  | -1.49599500 | 0.00001500  |
| C | 2.34389900  | -1.02264900 | -0.00000300 |
| H | 2.87533000  | -0.07428400 | -0.00002600 |
| H | 2.63090600  | -1.58522900 | 0.88904200  |
| H | 2.63088800  | -1.58526200 | -0.88903200 |
| C | 0.45586000  | 0.53025400  | 0.00000200  |
| O | 1.15167400  | 1.56799000  | -0.00000400 |
| N | -0.79318400 | 0.99372000  | 0.00000500  |
| N | -1.98675300 | -0.35170700 | 0.00000200  |
| N | -3.05574000 | -0.59844000 | -0.00000600 |

### TS6

#### B3LYP/6-311++G(3df,3pd)

|                                              |             |             |             |
|----------------------------------------------|-------------|-------------|-------------|
| Zero-point correction=                       |             |             | 0.064406    |
| Thermal correction to Energy=                |             |             | 0.069805    |
| Thermal correction to Enthalpy=              |             |             | 0.070749    |
| Thermal correction to Gibbs Free Energy=     |             |             | 0.035758    |
| Sum of electronic and zero-point Energies=   |             |             | -263.247277 |
| Sum of electronic and thermal Energies=      |             |             | -263.241878 |
| Sum of electronic and thermal Enthalpies=    |             |             | -263.240934 |
| Sum of electronic and thermal Free Energies= |             |             | -263.275925 |
| N                                            | 0.00000000  | 0.00000000  | 0.00000000  |
| H                                            | 0.00000000  | 0.00000000  | 1.01051600  |
| C                                            | 1.28532400  | 0.00000000  | -0.68525900 |
| H                                            | 1.10565600  | 0.00922700  | -1.75653400 |
| H                                            | 1.89629300  | 0.86304100  | -0.41222700 |
| H                                            | 1.82890400  | -0.91042900 | -0.43466300 |
| C                                            | -1.12388000 | 0.57297300  | -0.58829600 |
| O                                            | -1.68007500 | 0.19112600  | -1.63576100 |
| N                                            | -1.62731600 | 1.58991200  | -0.00618400 |

### CBS-QB3

|                   |             |                      |             |
|-------------------|-------------|----------------------|-------------|
| Temperature=      | 298.150000  | Pressure=            | 1.000000    |
| E(ZPE)=           | 0.063737    | E(Thermal)=          | 0.069139    |
| E(SCF)=           | -261.772578 | DE(MP2)=             | -0.919836   |
| DE(CBS)=          | -0.090536   | DE(MP34)=            | -0.044575   |
| DE(CCSD)=         | -0.044884   | DE(Int)=             | 0.029766    |
| DE(Empirical)=    | -0.043792   |                      |             |
| CBS-QB3 (0 K)=    | -262.822699 | CBS-QB3 Energy=      | -262.817297 |
| CBS-QB3 Enthalpy= | -262.816353 | CBS-QB3 Free Energy= | -262.851316 |
| C                 | 0.00000000  | 0.00000000           | 0.00000000  |
| O                 | 0.00000000  | 0.00000000           | 1.24712200  |
| N                 | 1.13248500  | 0.00000000           | -0.81890000 |

|   |             |             |             |
|---|-------------|-------------|-------------|
| N | -1.13362100 | 0.01811800  | -0.59034400 |
| C | 2.06445500  | 1.12224000  | -0.79317100 |
| H | 2.01281600  | 1.58517500  | 0.19120200  |
| H | 3.08181200  | 0.75568700  | -0.94847100 |
| H | 1.83483000  | 1.87068100  | -1.55893800 |
| H | 1.03966000  | -0.52030300 | -1.68228700 |

### B3LYP/aug-cc-pVTZ

|                                              |             |             |             |
|----------------------------------------------|-------------|-------------|-------------|
| Zero-point correction=                       |             |             | 0.064309    |
| Thermal correction to Energy=                |             |             | 0.069720    |
| Thermal correction to Enthalpy=              |             |             | 0.070665    |
| Thermal correction to Gibbs Free Energy=     |             |             | 0.035645    |
| Sum of electronic and zero-point Energies=   |             |             | -263.252258 |
| Sum of electronic and thermal Energies=      |             |             | -263.246846 |
| Sum of electronic and thermal Enthalpies=    |             |             | -263.245902 |
| Sum of electronic and thermal Free Energies= |             |             | -263.280922 |
| N                                            | 0.65970300  | -0.34576800 | -0.46960900 |
| H                                            | 0.75314200  | -1.22155600 | -0.96406100 |
| C                                            | 1.81333400  | 0.15333900  | 0.26682500  |
| H                                            | 1.54107800  | 1.09283600  | 0.73972100  |
| H                                            | 2.15055000  | -0.55252900 | 1.02910200  |
| H                                            | 2.63209400  | 0.34075100  | -0.42754300 |
| C                                            | -0.63635900 | -0.02596400 | -0.07449100 |
| O                                            | -1.14040700 | 1.11552400  | -0.05507900 |
| N                                            | -1.37619700 | -0.98965200 | 0.31381000  |

### TS7

#### B3LYP/6-311++G(3df,3pd)

|                                              |             |             |             |
|----------------------------------------------|-------------|-------------|-------------|
| Zero-point correction=                       |             |             | 0.073053    |
| Thermal correction to Energy=                |             |             | 0.080935    |
| Thermal correction to Enthalpy=              |             |             | 0.081879    |
| Thermal correction to Gibbs Free Energy=     |             |             | 0.040180    |
| Sum of electronic and zero-point Energies=   |             |             | -372.809025 |
| Sum of electronic and thermal Energies=      |             |             | -372.801143 |
| Sum of electronic and thermal Enthalpies=    |             |             | -372.800199 |
| Sum of electronic and thermal Free Energies= |             |             | -372.841898 |
| N                                            | 0.00000000  | 0.00000000  | 0.00000000  |
| H                                            | 0.00000000  | 0.00000000  | 1.00871000  |
| C                                            | 1.29478400  | 0.00000000  | -0.66446500 |
| H                                            | 1.13436800  | 0.15958500  | -1.72786300 |
| H                                            | 1.89039800  | 0.82356300  | -0.27310600 |
| H                                            | 1.84443700  | -0.93354800 | -0.51942400 |
| C                                            | -1.09539100 | -0.68250200 | -0.63419100 |
| O                                            | -1.56576600 | -0.41063300 | -1.71235500 |



|   |             |             |             |
|---|-------------|-------------|-------------|
| N | -1.22368500 | -1.64383700 | 0.27556200  |
| N | -2.74043900 | -2.50026000 | -0.15574000 |
| N | -3.42312200 | -3.35131700 | -0.06838000 |

### CBS-QB3

|                   |             |                      |             |
|-------------------|-------------|----------------------|-------------|
| Temperature=      | 298.150000  | Pressure=            | 1.000000    |
| E(ZPE)=           | 0.072323    | E(Thermal)=          | 0.080215    |
| E(SCF)=           | -370.745039 | DE(MP2)=             | -1.320734   |
| DE(CBS)=          | -0.126086   | DE(MP34)=            | -0.035417   |
| DE(CCSO)=         | -0.045644   | DE(Int)=             | 0.041503    |
| DE(Empirical)=    | -0.059134   |                      |             |
| CBS-QB3 (0 K)=    | -372.218228 | CBS-QB3 Energy=      | -372.210336 |
| CBS-QB3 Enthalpy= | -372.209392 | CBS-QB3 Free Energy= | -372.251103 |
| N                 | 0.00000000  | 0.00000000           | 0.00000000  |
| H                 | 0.00000000  | 0.00000000           | 1.01072200  |
| C                 | 1.29777400  | 0.00000000           | -0.66378600 |
| H                 | 1.12862900  | 0.10022000           | -1.73580100 |
| H                 | 1.87324100  | 0.86191800           | -0.31896600 |
| H                 | 1.87435700  | -0.91239800          | -0.47307400 |
| C                 | -1.09315400 | -0.69920700          | -0.63526800 |
| O                 | -1.56438000 | -0.43765200          | -1.71524800 |
| N                 | -1.20303500 | -1.65928700          | 0.28286100  |
| N                 | -2.68404100 | -2.56286800          | -0.10684300 |
| N                 | -3.30499000 | -3.45726800          | 0.05139000  |

### B3LYP/ aug-cc-pVTZ

|                                              |             |             |             |
|----------------------------------------------|-------------|-------------|-------------|
| Zero-point correction=                       |             |             | 0.072971    |
| Thermal correction to Energy=                |             |             | 0.080857    |
| Thermal correction to Enthalpy=              |             |             | 0.081801    |
| Thermal correction to Gibbs Free Energy=     |             |             | 0.040094    |
| Sum of electronic and zero-point Energies=   |             |             | -372.817431 |
| Sum of electronic and thermal Energies=      |             |             | -372.809544 |
| Sum of electronic and thermal Enthalpies=    |             |             | -372.808600 |
| Sum of electronic and thermal Free Energies= |             |             | -372.850308 |
| N                                            | -1.54176300 | -0.36363700 | -0.50143400 |
| H                                            | -1.44844000 | -1.21115300 | -1.03987900 |
| C                                            | -2.62399100 | -0.30858300 | 0.47060300  |
| H                                            | -2.68732200 | 0.70661400  | 0.85508000  |
| H                                            | -3.55956400 | -0.55186200 | -0.03157000 |
| H                                            | -2.47940800 | -1.00097000 | 1.30408300  |
| C                                            | -0.32022000 | 0.33763800  | -0.20915500 |
| O                                            | -0.21269100 | 1.53061900  | -0.04550800 |
| N                                            | 0.44827900  | -0.74136000 | -0.08780200 |
| N                                            | 2.12603900  | -0.11691600 | 0.01808700  |

|   |            |             |            |
|---|------------|-------------|------------|
| N | 3.18766400 | -0.25836000 | 0.24367200 |
|---|------------|-------------|------------|

### TS8

#### B3LYP/6-311++G(3df,3pd)

|                                              |             |             |             |
|----------------------------------------------|-------------|-------------|-------------|
| Zero-point correction=                       |             |             | 0.070609    |
| Thermal correction to Energy=                |             |             | 0.078531    |
| Thermal correction to Enthalpy=              |             |             | 0.079475    |
| Thermal correction to Gibbs Free Energy=     |             |             | 0.036770    |
| Sum of electronic and zero-point Energies=   |             |             | -372.796790 |
| Sum of electronic and thermal Energies=      |             |             | -372.788868 |
| Sum of electronic and thermal Enthalpies=    |             |             | -372.787923 |
| Sum of electronic and thermal Free Energies= |             |             | -372.830629 |
| N                                            | 1.16730700  | -0.48559900 | 0.05180400  |
| H                                            | 0.13768300  | -0.94147300 | 0.37052600  |
| C                                            | 2.52557600  | -0.97510400 | -0.21535100 |
| H                                            | 3.17984400  | -0.15670200 | -0.50639500 |
| H                                            | 2.91712100  | -1.44905000 | 0.68223200  |
| H                                            | 2.48405000  | -1.70530900 | -1.02021900 |
| C                                            | 0.81707300  | 0.73076600  | 0.03809100  |
| O                                            | 0.81599800  | 1.88028300  | -0.07033300 |
| N                                            | -1.07640700 | -0.30077900 | 0.73158700  |
| N                                            | -2.08328700 | -0.28636700 | 0.05982400  |
| N                                            | -3.05083800 | -0.25921300 | -0.54320300 |

#### CBS-QB3

|                   |             |                      |             |
|-------------------|-------------|----------------------|-------------|
| Temperature=      | 298.150000  | Pressure=            | 1.000000    |
| E(ZPE)=           | 0.069946    | E(Thermal)=          | 0.077852    |
| E(SCF)=           | -370.680052 | DE(MP2)=             | -1.388953   |
| DE(CBS)=          | -0.131197   | DE(MP34)=            | -0.002588   |
| DE(CCSO)=         | -0.047186   | DE(Int)=             | 0.043254    |
| DE(Empirical)=    | -0.058532   |                      |             |
| CBS-QB3 (0 K)=    | -372.195309 | CBS-QB3 Energy=      | -372.187402 |
| CBS-QB3 Enthalpy= | -372.186458 | CBS-QB3 Free Energy= | -372.228987 |
| N                 | 1.16594500  | -0.49495900          | 0.04889300  |
| H                 | 0.11929900  | -0.95286400          | 0.37963700  |
| C                 | 2.53668000  | -0.95807200          | -0.21425000 |
| H                 | 3.17465600  | -0.12849700          | -0.52089300 |
| H                 | 2.94301400  | -1.41129000          | 0.69101500  |
| H                 | 2.50999300  | -1.70330500          | -1.00968200 |
| C                 | 0.79979600  | 0.72060400           | 0.04167000  |
| O                 | 0.81153100  | 1.87349900           | -0.07018600 |
| N                 | -1.06175800 | -0.29708800          | 0.72060300  |
| N                 | -2.08100600 | -0.28535300          | 0.05743600  |
| N                 | -3.06004800 | -0.26077500          | -0.53309000 |

**B3LYP/aug-cc-pVTZ**

|                                              |             |             |             |
|----------------------------------------------|-------------|-------------|-------------|
| Zero-point correction=                       |             |             | 0.070523    |
| Thermal correction to Energy=                |             |             | 0.078442    |
| Thermal correction to Enthalpy=              |             |             | 0.079386    |
| Thermal correction to Gibbs Free Energy=     |             |             | 0.036707    |
| Sum of electronic and zero-point Energies=   |             |             | -372.804688 |
| Sum of electronic and thermal Energies=      |             |             | -372.796770 |
| Sum of electronic and thermal Enthalpies=    |             |             | -372.795826 |
| Sum of electronic and thermal Free Energies= |             |             | -372.838504 |
| N                                            | 1.16887800  | -0.48667900 | 0.05156200  |
| H                                            | 0.13610600  | -0.94324500 | 0.36852700  |
| C                                            | 2.52905200  | -0.97270200 | -0.21462300 |
| H                                            | 3.18161800  | -0.15216600 | -0.50417200 |
| H                                            | 2.92051500  | -1.44669700 | 0.68325300  |
| H                                            | 2.48983100  | -1.70249300 | -1.02029300 |
| C                                            | 0.81660200  | 0.72928000  | 0.03817900  |
| O                                            | 0.81480600  | 1.88044300  | -0.06936700 |
| N                                            | -1.07479500 | -0.30190000 | 0.72647200  |
| N                                            | -2.08455200 | -0.28691800 | 0.05868200  |
| N                                            | -3.05530900 | -0.25856100 | -0.53867500 |

CASPT2(8,8)/6-311+G\*\* Calculated energies (in Hartrees) of Me(H)NC(O)N.

***syn*-singlet Me(H)NC(O)N (CSS)**

CASPT2 Energy: -262.598958384636 u.a

---

---

|          |            |           |           |
|----------|------------|-----------|-----------|
| 22220000 | 0.9376470  |           |           |
| 22022000 | -0.2270802 |           |           |
| 22200200 | -0.1090922 |           |           |
| 22a2b000 | -0.0601058 |           |           |
| 22b2a000 | 0.0601058  |           |           |
| 22baab00 | -0.0561257 |           |           |
| 22abba00 | -0.0561257 |           |           |
| 20220020 | -0.0533506 |           |           |
| N        | -0.059626  | 0.129600  | -0.122610 |
| C        | -1.298970  | 0.682099  | 0.016099  |
| C        | 0.468096   | -0.743188 | 0.919629  |
| O        | -1.932753  | 0.680517  | 1.117703  |
| N        | -1.921207  | 1.302551  | -0.997399 |
| H        | -0.107853  | -1.669584 | 1.014649  |
| H        | 1.508093   | -0.983061 | 0.671771  |
| H        | 0.446348   | -0.218886 | 1.875062  |
| H        | 0.246942   | -0.019291 | -1.072894 |

***anti*-singlet Me(H)NC(O)N (CSS)**

CASPT2 Energy: -262.599788785962 u.a.

---

---

|          |            |           |           |
|----------|------------|-----------|-----------|
| 22220000 | 0.9368714  |           |           |
| 22022000 | -0.2298671 |           |           |
| 22200200 | -0.1094002 |           |           |
| 22a2b000 | -0.0607932 |           |           |
| 22b2a000 | 0.0607932  |           |           |
| 22abba00 | -0.0560281 |           |           |
| 22baab00 | -0.0560281 |           |           |
| 20220020 | -0.0530291 |           |           |
| N        | -0.107174  | -0.075044 | -0.020557 |
| C        | -1.188031  | 0.634207  | 0.347325  |
| C        | 0.336178   | 0.001807  | -1.410850 |
| O        | -1.648402  | 0.897753  | 1.536797  |
| N        | -2.175239  | 1.249435  | -0.193945 |
| H        | 0.823102   | 0.954612  | -1.640760 |
| H        | 1.026082   | -0.819667 | -1.604145 |
| H        | -0.533426  | -0.119347 | -2.058943 |
| H        | 0.595829   | -0.167305 | 0.699968  |

***syn*-triplet Me(H)NC(O)N (T)**

CASPT2 Energy: -262.61559462 u.a.

---

---

|          |            |           |           |
|----------|------------|-----------|-----------|
| 222aa000 | 0.9723652  |           |           |
| 220aa200 | -0.1162440 |           |           |
| 2220aa00 | -0.0665902 |           |           |
| 22a2a000 | -0.0545118 |           |           |
| 22abaa00 | -0.0533169 |           |           |
| 2202aa00 | 0.0527310  |           |           |
| N        | -0.108279  | 0.094570  | -0.117360 |
| C        | -1.327354  | 0.667648  | 0.074780  |
| C        | 0.474103   | -0.747526 | 0.918129  |
| O        | -1.955192  | 0.665307  | 1.125417  |
| N        | -1.839909  | 1.333416  | -1.064446 |
| H        | -0.085561  | -1.679424 | 1.044019  |
| H        | 1.504762   | -0.973017 | 0.643415  |
| H        | 0.465611   | -0.207043 | 1.865187  |
| H        | 0.220889   | 0.006830  | -1.067129 |

***anti*-triplet Me(H)NC(O)N (T)**

CASPT2 Energy: -262.61425330 u.a.

---

---

|          |            |           |           |
|----------|------------|-----------|-----------|
| 222aa000 | 0.9720080  |           |           |
| 202aa200 | -0.0966843 |           |           |
| 2a22a000 | 0.0567186  |           |           |
| 2220aa00 | 0.0540110  |           |           |
| N        | -0.114650  | -0.198844 | -0.076099 |
| C        | -1.027524  | 0.806968  | -0.191150 |
| C        | -0.064215  | -1.131731 | 1.044452  |
| O        | -1.241696  | 1.462562  | -1.205549 |
| N        | -1.750555  | 1.131367  | 0.980634  |
| H        | -0.824480  | -1.915519 | 0.967533  |
| H        | 0.924255   | -1.592104 | 1.069148  |
| H        | -0.209767  | -0.588491 | 1.978511  |
| H        | 0.292582   | -0.483616 | -0.956850 |
